1 **The transcription factor EGR2 is indispensable for tissue-specific imprinting of alveolar**  
2 **macrophages in health and tissue repair**

3

4 Jack McCowan<sup>1,2</sup>, Phoebe M. Kirkwood<sup>1,2</sup>, Frédéric Fercoq<sup>3</sup>, Wouter T'Jonck<sup>1,2</sup>, Connor M.  
5 Mawer<sup>1,4</sup>, Richard Cunningham<sup>1,2</sup>, Ananda S. Mirchandani<sup>1,2</sup>, Anna Hoy<sup>1,6</sup>, Gareth-Rhys  
6 Jones<sup>1,2</sup>, Carsten G. Hansen<sup>1,2</sup>, Nik Hirani<sup>1,2</sup>, Stephen J. Jenkins<sup>1,2</sup>, Sandrine Henri<sup>7</sup>, Bernard  
7 Malissen<sup>7</sup>, Sarah R. Walmsley<sup>1,2</sup>, David H. Dockrell<sup>1,2</sup>, Philippa T. K. Saunders<sup>1,2</sup>, Leo M.  
8 Carlin<sup>3,8</sup>, Calum C. Bain<sup>1,2\*</sup>

9

10 1 University of Edinburgh Centre for Inflammation Research, Queens Medical Research  
11 Institute, 47 Little France Crescent, Edinburgh BioQuarter, Edinburgh, EH16 4TJ, UK

12 2 Institute for Regeneration and Repair, University of Edinburgh, 5 Little France Drive,  
13 Edinburgh BioQuarter, Edinburgh EH16 4UU, UK

14 3 Cancer Research UK Beatson Institute, Glasgow, G61 1BD, UK

15 4 Current address: Rayne Institute, University College London, 5 University St, Bloomsbury,  
16 London WC1E 6JF

17 5 Institute of Immunology & Infection Research, School of Biological Sciences, University of  
18 Edinburgh, Edinburgh EH9 3FL, UK

19 6 Current address: Resolution Therapeutics Limited, Centre for Regenerative Medicine,  
20 Edinburgh BioQuarter, Edinburgh, EH16 4UU, UK

21 7 Centre d'Immunologie de Marseille-Luminy, Aix Marseille Université UM2, INSERM, U1104,  
22 CNRS UMR7280, 13288 Marseille, France

23 8 Institute of Cancer Sciences, University of Glasgow, Glasgow, G61 1QH, UK

24

25 \*Corresponding author & Lead Contact: [calum.bain@ed.ac.uk](mailto:calum.bain@ed.ac.uk)

26

27 **One Sentence Summary:** EGR2 controls alveolar macrophage function in health and disease

28

29

30

31 **Abstract**

32 Alveolar macrophages are the most abundant macrophages in the healthy lung where they  
33 play key roles in homeostasis and immune surveillance against air-borne pathogens. Tissue-  
34 specific differentiation and survival of alveolar macrophages relies on niche-derived factors,  
35 such as colony stimulating factor 2 (CSF-2) and transforming growth factor beta (TGF- $\beta$ ).  
36 However, the nature of the downstream molecular pathways that regulate the identity and  
37 function of alveolar macrophages and their response to injury remains poorly understood.  
38 Here, we identify that the transcriptional factor EGR2 is an evolutionarily conserved feature of  
39 lung alveolar macrophages and show that cell-intrinsic EGR2 is indispensable for the tissue-  
40 specific identity of alveolar macrophages. Mechanistically, we show that EGR2 is driven by  
41 TGF- $\beta$  and CSF-2 in a PPAR- $\gamma$ -dependent manner to control alveolar macrophage  
42 differentiation. Functionally, EGR2 was dispensable for lipid handling, but crucial for the  
43 effective elimination of the respiratory pathogen *Streptococcus pneumoniae*. Finally, we show  
44 that EGR2 is required for repopulation of the alveolar niche following sterile, bleomycin-  
45 induced lung injury and demonstrate that EGR2-dependent, monocyte-derived alveolar  
46 macrophages are vital for effective tissue repair following injury. Collectively, we demonstrate  
47 that EGR2 is an indispensable component of the transcriptional network controlling the identity  
48 and function of alveolar macrophages in health and disease.

49

50

## 51 **Introduction**

52 Tissue resident macrophages play fundamental roles in protective immunity and wound repair  
53 following injury, but also in the maintenance of homeostasis. The functions of macrophages  
54 vary to meet the demands of the local environment, and this is reflected in the phenotypic  
55 diversity detected amongst macrophages in different tissues. Indeed, although all tissue  
56 macrophages possess a common 'core' transcriptional signature (1), there are additional  
57 tissue-specific gene expression characteristics that enable organ- and even niche-specific  
58 functions (2, 3). However, the local environmental signals and the downstream molecular  
59 pathways that control this tissue-specific imprinting of macrophages in different environments  
60 are incompletely understood.

61 Alveolar macrophages are the most abundant macrophage population in the healthy  
62 lung, where they provide a first line of defence against airborne pathogens, as well as  
63 maintaining lung homeostasis, for instance through the regulation of pulmonary surfactant.  
64 However, in chronic lung pathologies such as allergic asthma, idiopathic pulmonary fibrosis  
65 (IPF) and chronic obstructive pulmonary disease (COPD), alveolar macrophages display  
66 aberrant activity and, in many cases, appear to perpetuate disease (4). Moreover, monocytes  
67 and macrophages appear to play a particular pathogenic role in the context of severe  
68 coronavirus disease 2019 (COVID-19) (5). Thus, the mechanisms governing alveolar  
69 macrophage imprinting may yield important insights into how lung-specific cues regulate  
70 homeostasis and susceptibility to disease.

71 Alveolar macrophages are derived from erythromyeloid progenitors (EMPs) and foetal  
72 liver monocytes that seed the lung during embryonic development (6-8). However, the  
73 characteristic phenotype and functional properties of alveolar macrophages do not develop  
74 until the first few days of postnatal life in parallel with alveolarisation of the lung and are  
75 controlled by CSF-2 (GM-CSF) (8-10) and the immunoregulatory cytokine TGF- $\beta$  (11).  
76 Together these cytokines induce expression of the transcription factor peroxisome proliferator-  
77 activated receptor gamma (PPAR- $\gamma$ ) to promote survival and tissue-specific specialisation,

78 including upregulation of genes involved in lipid uptake and metabolism. Consequently, mice  
79 in whom *Csf2rb*, *Tgfbr2* or *Pparg* has been genetically ablated in myeloid cells develop  
80 spontaneous pulmonary alveolar proteinosis (9-11). However, alveolar macrophages largely  
81 fail to develop in the absence of CSF-2 and TGF- $\beta$  receptor signalling due to their key role in  
82 macrophage survival. Therefore, it remains unclear if or how these factors control the tissue-  
83 specific identity and function of alveolar macrophages. Moreover, while considered the ‘master  
84 transcription factor’ of alveolar macrophages, PPAR- $\gamma$  has been implicated in the control of  
85 other tissue macrophages, including splenic red pulp macrophages (12, 13), and thus, the  
86 transcriptional network responsible for conferring specificity upon alveolar macrophage  
87 differentiation remains unclear. Finally, if and how additional transcriptional regulators are  
88 involved in regulating these processes in the context of inflammation and repair is largely  
89 unexplored.

90 Here, we have used single cell RNA sequencing (scRNA-seq) to identify the  
91 transcriptional regulators expressed by alveolar macrophages. We show that expression of  
92 the transcriptional factor EGR2 is a unique feature of lung alveolar macrophages compared  
93 with other lung mononuclear phagocytes and macrophages resident in other tissues. Using  
94 cell-specific ablation of *Egr2* and mixed bone marrow chimeric mice, we show that cell-intrinsic  
95 EGR2 is indispensable for the tissue-specific identity of alveolar macrophages and their ability  
96 to control infection with a major respiratory pathogen, *Streptococcus pneumoniae*. RNA  
97 sequencing (RNA-seq) shows that EGR2 controls a large proportion of the core transcriptional  
98 signature of alveolar macrophages, including expression of *Siglec5*, *Epcam* and *Car4*.  
99 Mechanistically, we show that EGR2 expression is induced by TGF- $\beta$  and CSF-2-dependent  
100 signalling, and acts to maintain expression of CCAAT-enhancer-binding protein beta (C/EBP $\beta$ )  
101 to control alveolar macrophage differentiation. Finally, using the bleomycin-induced model of  
102 lung injury and a combination of fate mapping approaches, we show that post-injury  
103 repopulation of the alveolar macrophage niche occurs via differentiation of bone marrow-



104 derived cells in an EGR2-dependent manner and that these monocyte-derived macrophages

105 are indispensable for effective tissue repair and resetting of tissue homeostasis.

106

107 **Results**

108 **EGR2 expression is a selective property of alveolar macrophages**

109 To begin to dissect the molecular pathways underlying the niche-specific imprinting of alveolar  
110 macrophages, we performed scRNA-seq of murine lung mononuclear phagocytes from lung  
111 digests to identify the unique transcriptional profile of alveolar macrophages. To this end, non-  
112 granulocytic CD45<sup>+</sup> cells from lungs of *Rag1*<sup>-/-</sup> mice were purified by FACS and sequenced  
113 using the 10x Chromium platform (**Supplementary Figure 1A**). 3936 cells passed quality  
114 control and were clustered using Uniform Manifold Approximation and Projection (UMAP)  
115 dimensionality reduction analysis within the *Seurat* R package. NK cells, identified by their  
116 expression of *Ncr1*, *Nkg7* and *Gzma*, were excluded (**Supplementary Figure 1A**) and the  
117 remaining myeloid cells were re-clustered to leave six clusters of mononuclear phagocytes,  
118 and these were annotated using known landmark gene expression profiles (**Figure 1A, B**).  
119 Cluster 1 represented monocytes based on their expression of *Itgam* (encoding CD11b), *Csf1r*  
120 and *Cd68*, and could be divided into classical and non-classical monocytes based on  
121 expression of *Ly6c2* and *Trem14* respectively (**Figure 1A, B**). Cluster 2 represented interstitial  
122 macrophages based on their high expression of *Cx3cr1*, *Cd68*, *Csf1r* and *H2-Aa* and lack of  
123 the *Xcr1* and *Cd209a* genes which defined cDC1 (cluster 5) and cDC2 (cluster 6) respectively.  
124 Alveolar macrophages (cluster 3) formed the largest population and could be defined by their  
125 expression of *Itgax* (encoding CD11c), *Siglec5* (encoding SiglecF) and *Car4*, and lack of  
126 *Cx3cr1* and *Itgam*. Cluster 4 was transcriptionally similar to cluster 3, but was defined by genes  
127 associated with cell cycle, including *Mki67*, *Birc5* and *Tubb5*, suggesting these represent  
128 proliferating alveolar macrophages (**Figure 1A, B**). Next, we compared gene expression  
129 profiles of these clusters, focussing on genes more highly expressed by alveolar macrophages  
130 relative to all other mononuclear phagocytes. 722 genes fitted these criteria, including *Fapb1*,  
131 *Spp1* (encoding osteopontin) and *Cidec* which are known to be uniquely and highly expressed  
132 by alveolar macrophages (**Supplementary Table 1**) (1, 3). Within this cassette of genes, we  
133 turned our attention to genes encoding transcription factors/regulators, as we hypothesised  
134 that these might control the tissue specific differentiation of alveolar macrophages. As

135 expected, these included *Pparg*, *Cebpb* and *Bhlhe41* which have been shown to control the  
136 development and self-renewal capacity of alveolar macrophages (9, 14, 15) (**Figure 1C**).  
137 However, this analysis also revealed transcription factors such as *Id1*, *Klf7* and *Egr2* which  
138 have not previously been implicated in the control of alveolar macrophage differentiation. We  
139 focussed on EGR2, which is part of a family of early growth response (EGR) transcription  
140 factors, comprising EGR1-4, as *Egr2* appeared to be expressed in a particularly selective  
141 manner by alveolar macrophages (**Figure 1D**) when compared with other tissue macrophages  
142 at mRNA (**Figure 1E**) and protein level (**Figure 1F, G & Supplementary Figure 2A**). In  
143 contrast, while highly expressed by alveolar macrophages, *Pparg* was also expressed at a  
144 high level by splenic red pulp macrophages (**Figure 1E**), consistent with previous reports (12,  
145 13). Next, we performed analogous analysis of *EGR2* expression across a variety of human  
146 macrophage populations from scRNA-seq data sets within the Human Cell Atlas. Consistent  
147 with our analysis in the mouse, this showed that *EGR2* expression was confined to lung  
148 macrophages, and in particular *FABP4*<sup>+</sup> macrophages which correspond to airway  
149 macrophages (**Figure 1H**), and we confirmed this at protein level, showing that CD163<sup>+</sup>HLA-  
150 DR<sup>+</sup> bronchoalveolar lavage (BAL) macrophages uniformly express EGR2 (**Supplementary**  
151 **Figure 2B**). Thus, these data demonstrate that EGR2 expression is a constitutive, specific  
152 and evolutionary conserved feature of alveolar macrophages.

153

154

155

156

157

158

159

160

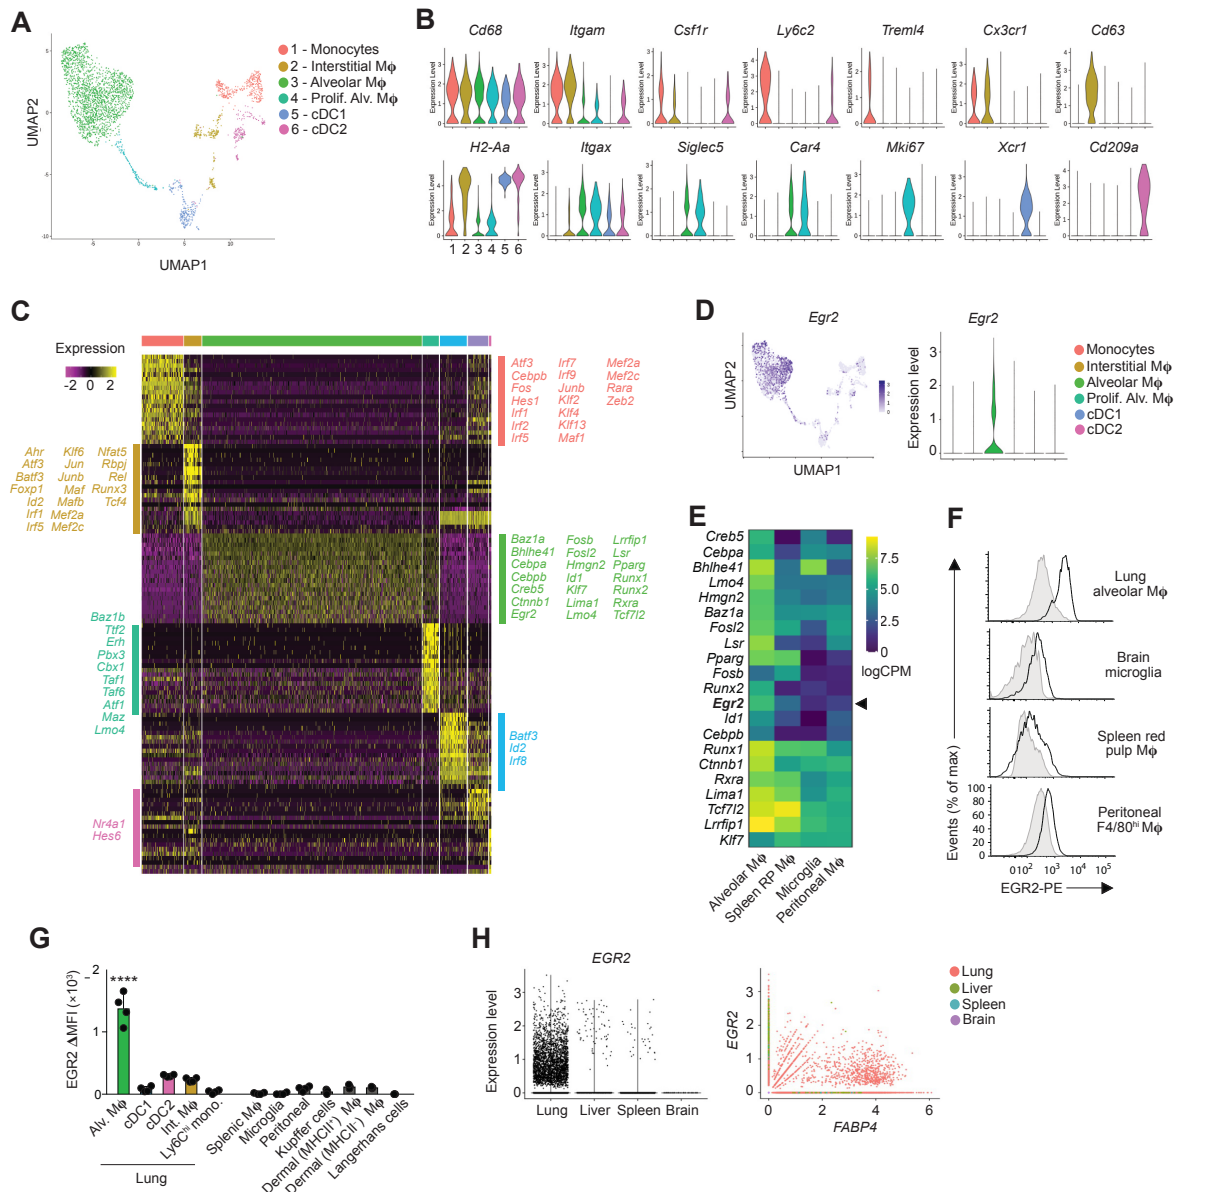

**Figure 1. EGR2 expression is a selective property of alveolar macrophages**

**A.** UMAP dimensionality reduction analysis of 3936 cells (non-granulocyte, myeloid cells) reveals six clusters of mononuclear phagocytes, including monocytes, macrophages (M $\phi$ ) and conventional dendritic cells (cDC) in murine lungs.

**B.** Feature plots displaying expression of individual genes by clusters identified in **A**.

**C.** Heatmap showing the top 20 most differentially expressed genes by each cluster defined in **A**. and annotated to show the upregulated transcription factors/regulators within each cluster.

**D.** Overlay UMAP plot and feature plot showing expression of *Egr2* by clusters identified in **A**.

**E.** Heatmap showing relative expression of selected transcription factors by lung alveolar macrophages, CD102<sup>+</sup> peritoneal macrophages, brain microglia and red pulp splenic macrophages as derived from the ImmGen consortium.

**F.** Representative expression of EGR2 by lung alveolar macrophages, CD102<sup>+</sup> peritoneal macrophages, brain microglia and red pulp splenic macrophages obtained from adult unmanipulated C57BL/6 mice. Shaded histograms represent isotype controls. Data are from one of three independent experiments with 3-4 mice per experiment.

180 **G.** Expression of EGR2 by the indicated macrophage and myeloid cell populations shown as relative  
181 mean fluorescence intensity (MFI) (MFI in *Egr2<sup>fl/fl</sup>* (Cre<sup>-</sup>) – MFI in *Lyz2<sup>Cre/+</sup>.Egr2<sup>fl/fl</sup>* (Cre<sup>+</sup>) mice). Data  
182 represent 3-4 mice per tissue. Error bars represent S.D. One-way ANOVA followed by Tukey's multiple  
183 comparisons post-test. \*\*\*\*  $p < 0.0001$

184 **H.** *In silico* analysis of EGR2 and FABP4 expression by lung, liver, spleen and brain macrophages  
185 extracted on the basis of C1QA<sup>+</sup> expression from (16-18).

186

187

## 188 **EGR2 is required for the phenotypic identity of alveolar macrophages**

189 Previous work has suggested that EGR1 and EGR2 act in a redundant manner (19), while  
190 other studies have suggested EGR transcription factors are completely dispensable for  
191 macrophage differentiation (20). However, many of these studies were performed *in vitro* and  
192 the roles of EGRs in tissue-specific macrophage differentiation has not been assessed  
193 comprehensively *in vivo*, in part, due to the postnatal lethality of global *Egr2<sup>-/-</sup>* mice (21, 22).  
194 To determine the role of EGR2 in alveolar macrophage development and differentiation, we  
195 crossed *Lyz2<sup>Cre</sup>* mice (23) with *Egr2<sup>fl/fl</sup>* mice (24), to generate a strain in which myeloid cells,  
196 including monocytes, macrophages, dendritic cells and neutrophils, lack EGR2 in a  
197 constitutive manner. We performed unbiased UMAP flow cytometry analysis on lung  
198 leukocytes obtained from *Lyz2<sup>Cre</sup>.Egr2<sup>fl/fl</sup>* mice (referred to here as Cre<sup>+</sup>) and *Egr2<sup>fl/fl</sup>* littermate  
199 controls (referred to here as Cre<sup>-</sup> mice), focussing on 'lineage' negative (CD3<sup>-</sup>CD19<sup>-</sup>NK1.1<sup>-</sup>  
200 Ly6G<sup>-</sup>) CD11c<sup>+</sup> and CD11b<sup>+</sup> cells in lung digests (**Figure 2A**). Surface marker analysis of cells  
201 pooled from Cre<sup>-</sup> and Cre<sup>+</sup> mice confirmed the presence of alveolar and interstitial  
202 macrophages, eosinophils and subsets of dendritic cells and monocytes (**Figure 2A**) and this  
203 was validated by manual gating (**Figure 2B & Supplementary Figure 3A**). Due to their  
204 CD11c<sup>hi</sup>CD11b<sup>-</sup> phenotype, alveolar macrophages clustered separately from the other  
205 CD11b<sup>+</sup> myeloid cells (**Figure 2A-C**). All myeloid cells, including alveolar macrophages, were  
206 equally abundant in the lungs of Cre<sup>-</sup> and Cre<sup>+</sup> mice. (**Figure 2D**). However, whereas alveolar  
207 macrophages from Cre<sup>-</sup> mice expressed high levels of SiglecF, the majority of alveolar  
208 macrophages obtained from Cre<sup>+</sup> mice lacked SiglecF expression (**Figure 2E**), explaining  
209 their distinct positioning within the alveolar macrophage cluster in the UMAP analysis. Indeed  
210 only ~7% of alveolar macrophages in Cre<sup>+</sup> mice expressed high levels of SiglecF, and further

211 analysis showed that these expressed high levels of EGR2 (**Figure 2F**), suggesting that the  
 212 SiglecF<sup>+</sup> cells remaining in the Cre<sup>+</sup> mouse represent cells that have escaped Cre-mediated  
 213 recombination. Consistent with this, SiglecF<sup>+</sup> cells in the Cre<sup>+</sup> mouse expressed high levels of  
 214 CD11c equivalent to alveolar macrophages from Cre<sup>-</sup> mice, whereas SiglecF<sup>-</sup> alveolar  
 215 macrophages expressed lower levels of CD11c (**Figure 2G**). We did not detect differences in  
 216 the proliferative activity of *Egr2*-sufficient and -deficient alveolar macrophages (**Figure 2G**).  
 217 Importantly and consistent with the lack of EGR2 expression by other tissue resident  
 218 macrophages, we saw no effect on the cell number and expression of signature markers by  
 219 resident macrophages in other tissues, including in the spleen where macrophages share a  
 220 dependence on PPAR- $\gamma$  (12, 13) (**Supplementary Figure 3B, C**). Thus, these data  
 221 demonstrate that while EGR2 expression is dispensable for alveolar macrophages survival  
 222 and self-maintenance, it is indispensable for imprinting key phenotypic features of the cells in  
 223 the healthy lung.

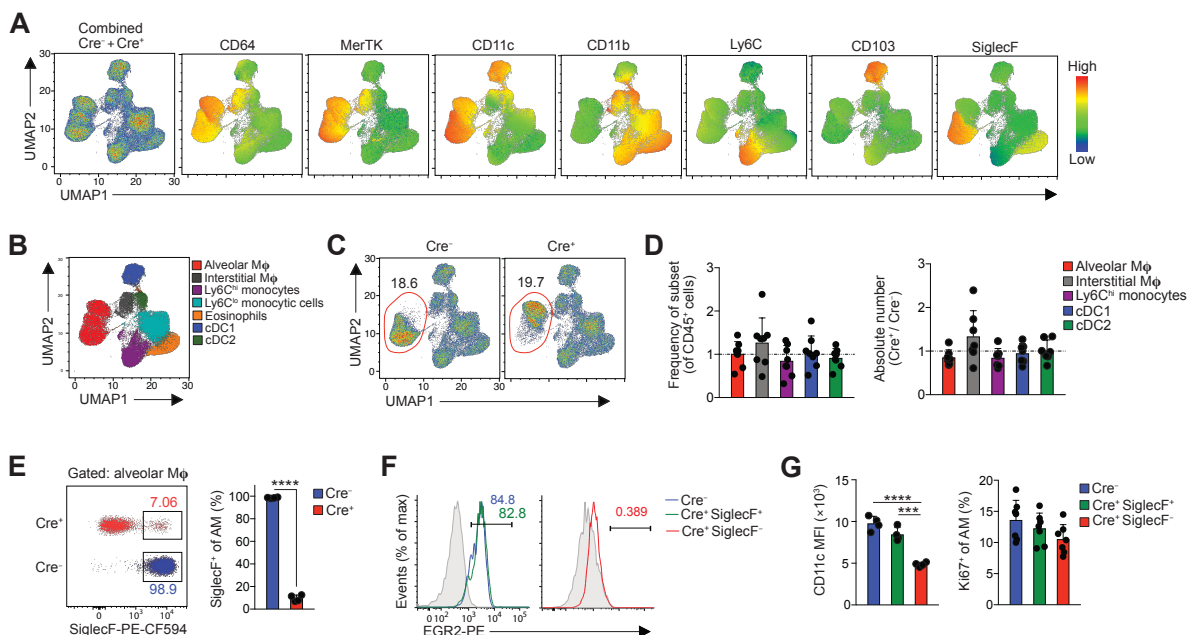

224  
225

**Figure 2: EGR2 is required for the phenotypic identity of alveolar macrophages**

226 **A.** UMAP analysis of CD3<sup>-</sup>CD19<sup>-</sup>NK1.1<sup>-</sup>Ly6G<sup>-</sup>CD11b<sup>+</sup>/CD11c<sup>+</sup> cells pooled from adult unmanipulated  
 227 Cre<sup>-</sup> and Cre<sup>+</sup> mice (*left panel*). Heatmap plots showing the relative expression of the indicated markers  
 228 by myeloid clusters.

229 **B.** Cluster identity confirmed by manual gating (see **Supplementary Figure 3A**).

230 **C.** Relative frequency of alveolar macrophages (red gate) of all CD45<sup>+</sup> leukocytes in unmanipulated  
 231 adult Cre<sup>-</sup> and Cre<sup>+</sup> mice.

232 **D.** Relative frequency and absolute number of alveolar macrophages, cDC1, cDC2, Ly6C<sup>hi</sup> monocytes  
233 and CD64<sup>+</sup>MHCII<sup>+</sup> interstitial macrophages in lung digests from adult unmanipulated Cre<sup>+</sup> mice  
234 compared with their abundance in Cre<sup>-</sup> littermates. Symbols represent individual mice and data are  
235 pooled from three independent experiments with 8 mice per group. Error bars represent S.D.

236 **E.** Representative expression of SiglecF by CD11c<sup>hi</sup>CD11b<sup>lo</sup> alveolar macrophages (from **F**) obtained  
237 from lung digests from adult unmanipulated Cre<sup>-</sup> or Cre<sup>+</sup> mice (*left*), frequency of SiglecF<sup>+</sup> macrophages  
238 in each strain (*right*). Symbols represent individual mice with 4 mice per group. Data are from one of at  
239 least 5 independent experiments. Error bars represent S.D. Student's *t* test, \*\*\*\*p<0.0001 (SiglecF)

240 **F.** Representative expression of EGR2 by SiglecF-defined alveolar macrophages. Shaded histograms  
241 represent isotype controls. Data are from one of three independent experiments with 3-4 mice per  
242 experiment.

243 **G.** Mean fluorescence intensity (MFI) of CD11c expression by SiglecF-defined CD11c<sup>hi</sup>CD11b<sup>lo</sup> alveolar  
244 macrophages from lung digests from adult unmanipulated Cre<sup>-</sup> or Cre<sup>+</sup> mice. Symbols represent  
245 individual mice with 4 mice per group. Data are from one of at least 5 independent experiments. Error  
246 bars represent S.D. One-way ANOVA followed by Tukey's multiple comparisons post-test. \*\*\* p<0.001,  
247 \*\*\*\* p<0.0001.

248  
249  
250

## 251 **EGR2 controls the tissue-specific transcriptional programme of alveolar macrophages**

252 The failure of alveolar macrophages from Cre<sup>+</sup> mice to express SiglecF suggested that the  
253 tissue-specific differentiation programme of these cells may be altered by *Egr2* deficiency.

254 Hence, to ascertain the global effects of *Egr2* deletion on alveolar macrophage differentiation,  
255 we next performed bulk RNA-seq of CD11c<sup>hi</sup>CD11b<sup>lo</sup> alveolar macrophages from lung digests  
256 of Cre<sup>-</sup> and Cre<sup>+</sup> mice (using only SiglecF<sup>-</sup> macrophages from Cre<sup>+</sup> mice to exclude  
257 confounding effects of EGR2-sufficient alveolar macrophages) (**Supplementary Figure 4**).

258 Unbiased clustering confirmed the biological replicates from each group were highly similar  
259 (**Figure 3A**) and differential gene expression (DEG) analysis revealed that 858 genes were  
260 differentially expressed by at least 2-fold (417 and 441 genes downregulated and upregulated,  
261 respectively) (**Supplementary Table 2**). Consistent with our flow cytometry analysis, *Siglec5*,

262 which encodes SiglecF, was one of the most downregulated genes in *Egr2* deficient alveolar  
263 macrophages (**Figure 3B**). Many of the most differentially expressed genes formed part of the  
264 alveolar macrophage gene set identified in our scRNA-seq analysis. Moreover, approximately  
265 30% of the core alveolar macrophage signature identified by the ImmGen consortium (1) was  
266 altered by *Egr2* deficiency (32 genes) (**Figure 3B, C**), including the expression of *Spp1*,  
267 *Epcam*, *Car4* and *Fabp1*, all of which were confirmed by flow cytometry or qPCR (**Figure 3D**,

268 **E**). The vast majority of these 'signature' genes was downregulated in *Egr2*-deficient



269 macrophages compared with their *Egr2*-sufficient counterparts. Gene Ontology (GO) analysis  
270 revealed that the top pathways affected by *Egr2* deficiency were ‘Chemotaxis’, ‘Cell  
271 chemotaxis’ and ‘Immune system process’ (**Supplementary Table 3**). Consistent with this,  
272 the expression of chemokine receptors, such as *Ccr2* and *Cx3cr1*, was elevated in alveolar  
273 macrophages from Cre<sup>+</sup> mice compared with their Cre<sup>-</sup> counterparts (**Figure 3F**). Genes  
274 encoding antigen presentation machinery, such as *H2-Aa*, *H2-Eb1*, *Ciita* and *Cd74* were also  
275 upregulated in alveolar macrophages from Cre<sup>+</sup> mice. In parallel, there was significantly  
276 greater expression of MHCII at the protein level in *Egr2* deficient alveolar macrophages  
277 (**Figure 3F**). Indeed, over 50 genes upregulated in *Egr2* deficient alveolar macrophages were  
278 genes that defined interstitial macrophages in our scRNA-seq analysis, including *Cd63*, *Mafb*,  
279 *Mmp12* and *Msr1* (**Figure 3D**, **Supplementary Table 2**). Thus, EGR2 ablation renders  
280 alveolar macrophages transcriptionally more similar to their interstitial counterparts.

281 Further phenotypic analysis revealed reduced expression of ‘core signature’ alveolar  
282 macrophage markers TREM1 and CD11a at protein level in the context of *Egr2* deficiency  
283 (**Figure 3G**). EpCAM and CD11a expression have been implicated in regulating adherence to  
284 and patrolling of the lung epithelium by alveolar macrophages (25). Interestingly, while we  
285 found equivalent numbers of alveolar macrophages amongst tissue digests, we obtained  
286 consistently higher numbers of alveolar macrophages in the bronchoalveolar lavage (BAL)  
287 fluid of Cre<sup>+</sup> mice, suggesting the EGR2-dependent differentiation programme may control the  
288 ability of alveolar macrophages to adhere to and interact with cells of their niche in the airways  
289 (**Figure 3H**).

290  
291  
292  
293  
294  
295  
296  
297  
298



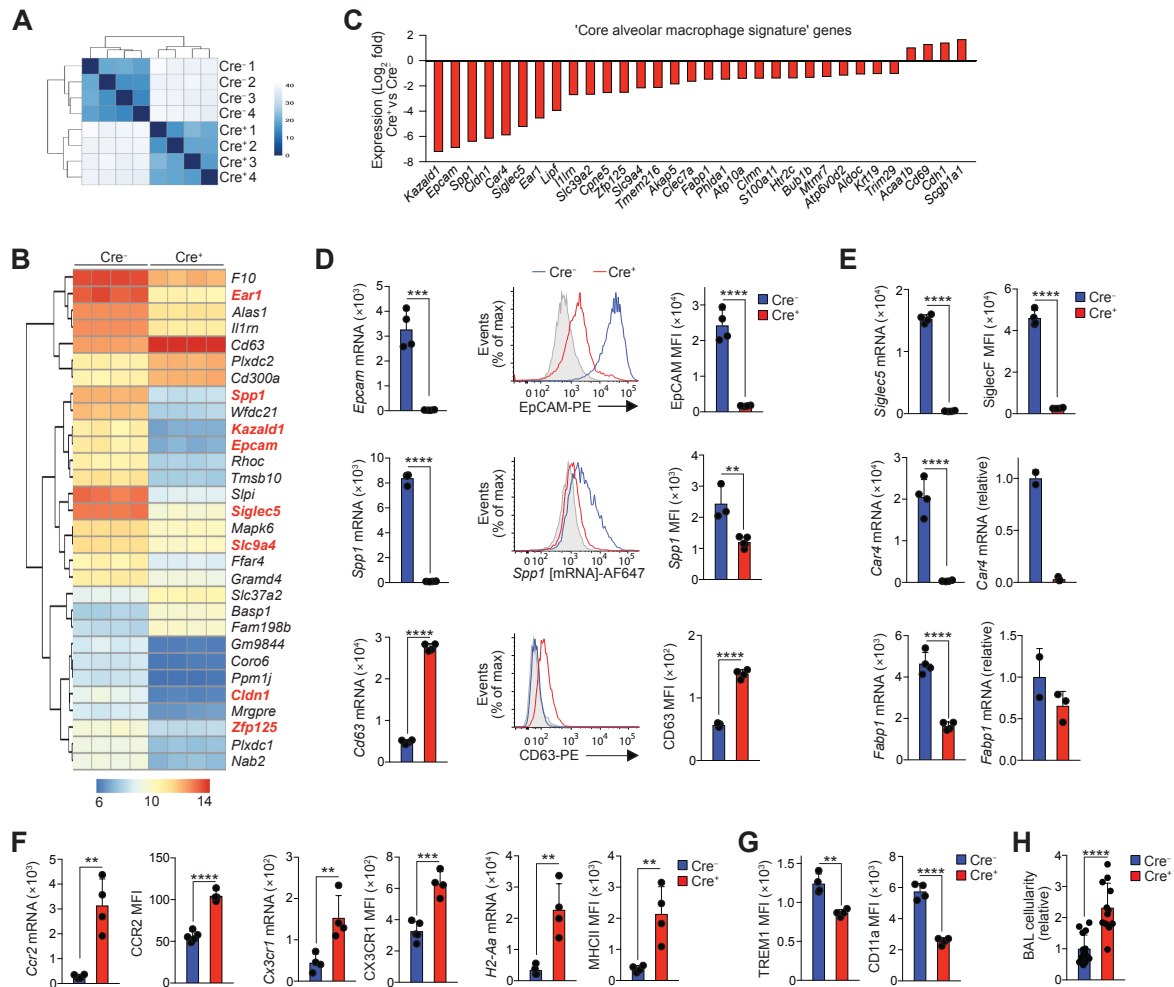

299  
300  
301

**Figure 3: EGR2 controls tissue-specific transcriptional programme of alveolar macrophages**

302

303

**A.** Heatmap of RNA-seq data showing the distance between samples from Cre<sup>-</sup> and Cre<sup>+</sup> mice.

304

305

306

307

**B.** Heatmap showing expression of the 30 most differentially expressed genes by alveolar macrophages from Cre<sup>-</sup> and Cre<sup>+</sup> mice. Each column represents a biological replicate with four mice per group. Genes highlighted in red appear in the 'core signature' of alveolar macrophages as defined by the ImmGen Consortium (1).

308

309

**C.** Log<sub>2</sub>-fold expression of differentially expressed genes that form part of the 'core signature' of alveolar macrophages as defined by the ImmGen Consortium (1).

310

311

312

313

314

315

**D.** Expression of *Epcam*, *Spp1* and *Cd63* from the RNA-seq dataset (*left panels*), representative flow cytometric validation of EpCAM, *Spp1* (mRNA detected by PrimeFlow technology) and CD63 expression (*middle panels*) and replicate MFI expression data of each of these markers by alveolar macrophages from adult unmanipulated Cre<sup>-</sup> and Cre<sup>+</sup> mice. Symbols represent individual mice and data are from one of two independent experiments with 5 (Cre<sup>-</sup>) and 4 (Cre<sup>+</sup>) mice per group. Student's *t* test, \*\**p*<0.01, \*\*\**p*<0.001, \*\*\*\**p*<0.0001.

316

317

318

319

**E.** Expression of *Siglec5*, *Car4* and *Fabp1* from the RNA-seq dataset (*left panels*) and validation by flow cytometry (SiglecF) or qPCR (*Car4*, *Fabp1*). Symbols represent individual mice and data for SiglecF is from one of at least 10 independent experiments with 5 (Cre<sup>-</sup>) and 4 (Cre<sup>+</sup>) mice per group. Data for *Car4* and *Fabp1* represents 2 (Cre<sup>-</sup>) and 4 (Cre<sup>+</sup>) mice per group. Student's *t* test, \*\*\*\**p*<0.0001.

320

321

322

323

**F.** Expression of *Ccr2*, *Cx3cr1* and *H2-Aa* from the RNA-seq dataset and replicate MFI expression data of CCR2, CX3CR1 and MHCII as determined by flow cytometry. Symbols represent individual mice and data are from one of two independent experiments with 5 (Cre<sup>-</sup>) and 4 (Cre<sup>+</sup>) mice per group. Student's *t* test, \*\**p*<0.01, \*\*\**p*<0.001, \*\*\*\**p*<0.0001.

324 **G.** Replicate MFI data of for CD11a and TREM1 expression as determined by flow cytometry. Symbols  
325 represent individual mice and data are from one of two independent experiments with 5 (Cre<sup>-</sup>) and 4  
326 (Cre<sup>+</sup>) mice per group. Student's *t* test, \*\**p*<0.01, \*\*\*\**p*<0.0001.

327 **H.** Absolute number of CD11c<sup>hi</sup>CD11b<sup>-</sup> alveolar macrophages present in the BAL of adult  
328 unmanipulated Cre<sup>+</sup> mice relative to their abundance in Cre<sup>-</sup> littermates. Symbols represent individual  
329 mice and data are pooled from three independent experiments with 15 (Cre<sup>-</sup>) and 12 (Cre<sup>+</sup>) mice per  
330 group.

331 In all graphs error bars represent S.D.

332

333

### 334 **EGR2 controls distinct functional characteristics of alveolar macrophages**

335

336 Individuals with mutations in *EGR2* develop peripheral neuropathies due to the crucial role for

337 *EGR2* in Schwann cell function (26). However, many of these individuals also frequently

338 encounter respiratory complications, including recurrent pneumonias and/or restrictive

339 pulmonary disease, and in some cases respiratory failure (26). The cause of respiratory

340 compromise in these individuals remains unexplained. To determine if alterations in alveolar

341 macrophage behaviour may contribute to this, we next tested the function of *Egr2*-deficient

342 alveolar macrophages. A major homeostatic function of alveolar macrophages is the

343 regulation of pulmonary surfactant, and the absence of alveolar macrophages results in the

344 development of pulmonary alveolar proteinosis (PAP) (8-10, 27, 28). However, *Egr2*

345 deficiency did not lead to spontaneous PAP, as there were no differences in the levels of total

346 protein in BAL fluid from Cre<sup>+</sup> and Cre<sup>-</sup> mice at either 4 or >9 months of age, a time at which

347 PAP is detectable in *Csf2rb*<sup>-/-</sup> mice (28) (**Figure 4A**). However, these results were confounded

348 by the fact that the majority of alveolar macrophages in aged (>9 months) Cre<sup>+</sup> mice was now

349 *EGR2*-sufficient, with most cells expressing high levels of SiglecF (**Figure 4B, C**). These

350 findings suggested that the cells that had escaped Cre recombination may have a competitive

351 advantage over their *EGR2*-deficient counterparts and indeed, the absolute number of

352 SiglecF<sup>+</sup> alveolar macrophages no longer differed between aged Cre<sup>-</sup> and Cre<sup>+</sup> mice (**Figure**

353 **4D**). These data are consistent with other studies noting age-related repopulation of the

354 alveolar niche with Cre 'escapees' in the *Lyz2*<sup>Cre</sup> mouse (11). Notably, however, this

355 preferential expansion of *EGR2*-sufficient 'escapees' did not relate to differences in the level

356 of proliferation by EGR2-defined subsets, with identical frequencies of Ki67<sup>+</sup> cells amongst  
357 EGR2-sufficient and -deficient macrophages in young adult and aged mice (**Figure 4E**).

358 In an attempt to circumvent the confounding effects of these escapees, we generated  
359 a second strain to delete *Egr2* from macrophages by crossing *Egr2*<sup>fl/fl</sup> mice with mice  
360 expressing 'improved' Cre recombinase under control of the endogenous *Fcgr1* promoter  
361 (*Fcgr1*<sup>iCre</sup> (3)). By using *Fcgr1*<sup>iCre</sup>.*Rosa26*<sup>LSL-RFP</sup> reporter mice, we confirmed that this approach  
362 led to efficient Cre recombination in alveolar macrophages, as well as in other tissue  
363 macrophages, but not in other leukocytes (**Supplementary Figure 5A**). Importantly, alveolar  
364 macrophages from *Fcgr1*<sup>iCre</sup>.*Egr2*<sup>fl/fl</sup> mice phenocopied those from *Lyz2*<sup>Cre</sup>.*Egr2*<sup>fl/fl</sup> mice  
365 (**Supplementary Figure 5B**), but the frequency of Cre escapees was markedly lower in  
366 *Fcgr1*<sup>iCre</sup>.*Egr2*<sup>fl/fl</sup> mice compared with *Lyz2*<sup>Cre</sup>.*Egr2*<sup>fl/fl</sup> mice (**Supplementary Figure 5C, D**).  
367 Despite this, we did not detect the development of proteinosis in aged *Fcgr1*<sup>iCre</sup>.*Egr2*<sup>fl/fl</sup> mice  
368 compared to their littermate controls (**Supplementary Figure 5E**). Consistent with this, *Egr2*  
369 deficiency had little if any effect on the expression of genes associated with lipid uptake and  
370 metabolism that are characteristic of normal alveolar macrophages (9) (**Figure 4F**). Thus,  
371 while EGR2 is indispensable for the phenotypic identity of alveolar macrophages, it seems to  
372 be dispensable for regulating lipid handling.

373 We next sought to determine if EGR2-dependent differentiation controls protective  
374 immune functions of alveolar macrophages. To do so, we infected Cre<sup>-</sup> (*Egr2*<sup>fl/fl</sup>) mice and  
375 Cre<sup>+</sup> (*Lyz2*<sup>Cre</sup>.*Egr2*<sup>fl/fl</sup>) mice with 1x10<sup>4</sup> colony forming units (CFU) *Streptococcus pneumoniae*,  
376 based on previous work showing that wild type alveolar macrophages efficiently clear infection  
377 at this dose (30, 31). This showed that the majority of Cre<sup>-</sup> mice (8/12) had cleared infection  
378 at 14 hours post infection, whereas the majority of Cre<sup>+</sup> mice (8/10) had detectable bacteria in  
379 the airways at this timepoint (**Figure 4G**). Importantly, the failure to clear bacteria did not  
380 reflect the loss of tissue resident macrophages that can occur during inflammation or infection,  
381 as alveolar macrophages continued to dominate the airways in both Cre<sup>+</sup> and Cre<sup>-</sup> mice  
382 (**Figure 4H**). However, our RNA-seq analysis showed that expression of genes encoding  
383 molecules for the recognition, opsonisation and elimination of bacteria, including *Col12*,

384 *Wfdc10*, *C3* and *Marco*, the latter of which has been shown to be indispensable for immunity  
 385 to *S. pneumoniae* (32), were significantly reduced in *Egr2*-deficient alveolar macrophages  
 386 (Figure 4I). Thus, EGR2-dependent differentiation is crucial for equipping alveolar  
 387 macrophages with the machinery to capture and destroy pneumococci.

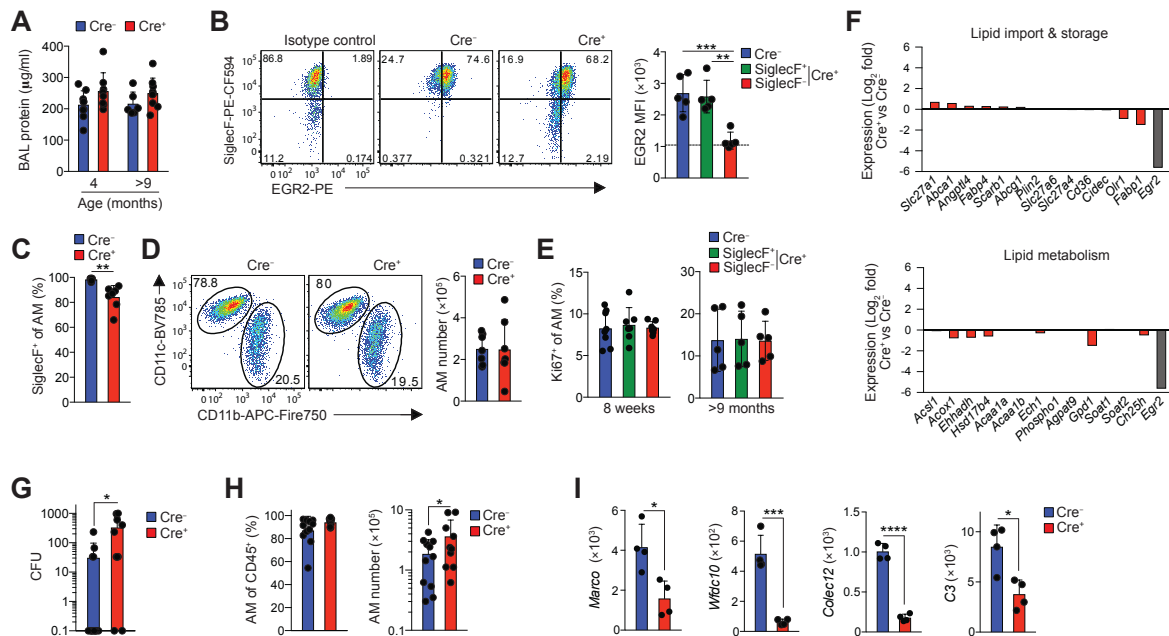

388  
 389

390 **Figure 4: EGR2 controls distinct functional characteristics of alveolar macrophages**  
 391 **A.** Protein levels in the BAL fluid of Cre<sup>-</sup> or Cre<sup>+</sup> mice at 4 or 9-12 months of age. Symbols represent  
 392 individual mice and error is S.D. Data are from 6-9 mice per group pooled from two independent cohorts  
 393 of aged mice.

394 **B.** Representative expression of SiglecF and EGR2 by CD11c<sup>hi</sup>CD11b<sup>lo</sup> macrophages and mean  
 395 fluorescent intensity (MFI) of EGR2 by SiglecF-defined CD11c<sup>hi</sup>CD11b<sup>lo</sup> macrophages obtained from  
 396 11-12 month old Cre<sup>-</sup> or Cre<sup>+</sup> mice. Symbols represent individual mice and error is S.D. Data are from  
 397 5 mice per group pooled from two independent cohorts of aged mice. One-way ANOVA followed by  
 398 Tukey's multiple comparisons post-test. \*\* p<0.01, \*\*\* p<0.001.

399 **C.** Frequency of SiglecF<sup>+</sup> cells amongst CD11c<sup>hi</sup>CD11b<sup>lo</sup> macrophages obtained from 11-12 month old  
 400 Cre<sup>-</sup> or Cre<sup>+</sup> mice. Symbols represent individual mice and error is S.D. Data are from 7 mice per group  
 401 pooled from three independent cohorts of aged mice. Unpaired Student's *t*-test, \*\*p<0.01

402 **D.** Representative expression of CD11c and CD11b by Ly6C<sup>lo</sup>CD64<sup>+</sup> macrophages obtained from 11-  
 403 12 month old Cre<sup>-</sup> or Cre<sup>+</sup> mice. Symbols represent individual mice and error is s.d.. Data represent 7  
 404 mice per group pooled from three independent cohorts of aged mice.

405 **E.** Frequency of Ki67<sup>+</sup> cells amongst SiglecF-defined CD11c<sup>hi</sup>CD11b<sup>lo</sup> macrophages obtained from 8  
 406 week old or 11-12 month old Cre<sup>-</sup> or Cre<sup>+</sup> mice. Symbols represent individual mice and error is s.d..  
 407 Data represent 7 (Cre<sup>+</sup>) or 8 (Cre<sup>-</sup>) mice per group (8 week old mice) or 5 mice per group (aged mice)  
 408 pooled from two independent experiments.

409 **F.** Log<sub>2</sub>-fold expression of genes that are implicated in lipid uptake or metabolism in alveolar  
 410 macrophages as defined by (9). Expression of *Egr2* is included as a reference.

411 **G.** Bacterial levels (colony forming units, CFU) in the BAL fluid of Cre<sup>-</sup> or Cre<sup>+</sup> mice 14hrs after infection.  
 412 Symbols represent individual mice and error is S.D. Data are from 10 (Cre<sup>+</sup>) or 12 (Cre<sup>-</sup>) mice per group  
 413 pooled from three independent experiments. Mann Whitney test, \*p<0.05.

414 **H.** Frequency and absolute number of CD11c<sup>hi</sup>CD11b<sup>lo</sup> alveolar macrophages in the BAL fluid of Cre<sup>-</sup>  
415 or Cre<sup>+</sup> mice 14hrs after infection. Symbols represent individual mice and error is S.D. Data are from  
416 10 (Cre<sup>+</sup>) or 11 (Cre<sup>-</sup>) mice per group pooled from three independent experiments. Mann Whitney test,  
417 \*p<0.05.

418 **I.** Expression of *Marco*, *Wfdc10*, *Colec12* and *C3* from the RNA-seq dataset (*left panels*). Each symbol  
419 represents a biological replicate with four mice per group.

420

## 421 **EGR2 expression by alveolar macrophages is dependent on TGFβ and CSF2**

422 Alveolar macrophages derive from foetal monocytes that seed the developing lung in the late  
423 gestational period (8). To determine the point at which EGR2 is first expressed, we assessed  
424 EGR2 expression by E10.5 yolk sac macrophages, by macrophages in the embryonic lung  
425 (E16.5) and by CD11c<sup>hi</sup>CD11b<sup>lo</sup> alveolar macrophages in the neonatal and adult lung using  
426 the ImmGen database. This revealed that *Egr2* was absent from yolk sac macrophages and  
427 macrophages in the embryonic lung at E16.5, but it was expressed by both neonatal and adult  
428 alveolar macrophages (**Figure 5A**), suggesting that it is induced during alveolarization in the  
429 neonatal period. Consistent with this, we found high expression of EGR2 at protein level by  
430 neonatal (d1) CD64<sup>+</sup> lung macrophages (sometimes referred to as ‘pre-alveolar macrophages’)  
431 in Cre<sup>-</sup> mice; as expected, this expression was deleted efficiently in Cre<sup>+</sup> mice (**Figure 5B, C**).  
432 Importantly, Ly6C<sup>hi</sup> monocytes in the lung of d1 neonatal mice lacked any expression of EGR2  
433 (**Figure 5B, C**), reinforcing the selectivity of EGR2 expression even at this highly dynamic  
434 stage of myeloid cell development in the lung. Consistent with our analysis of mature alveolar  
435 macrophages in adult mice, *Egr2* deletion had no impact on the frequency and absolute  
436 number of pre-alveolar macrophages (**Figure 5D**). However, phenotypic differences were  
437 already apparent in Cre<sup>+</sup> (*Ly2z<sup>Cre/+</sup>.Egr2<sup>fl/fl</sup>*) macrophages at this stage, with reduced CD11c  
438 and SiglecF expression which persisted into adulthood (**Figure 5E, F**). In parallel, EpCAM  
439 expression was absent from alveolar macrophages in the neonatal period and was  
440 progressively upregulated with age in an EGR2-dependent manner (**Figure 5F**). CD11b  
441 expression, which is downregulated in mature alveolar macrophages, was found on pre-  
442 alveolar macrophages in both Cre<sup>-</sup> and Cre<sup>+</sup> mice, and it was downregulated to the same  
443 extent with age in both strains.

444 We next set out to determine the environmental factors that drive EGR2 expression.  
445 Many studies employing *in vitro* culture systems have described EGR2 expression as a  
446 feature of 'alternatively activated' macrophages, dependent on IL-4R signalling (33-35).  
447 Importantly, expression of EGR2 by alveolar macrophages was independent of IL-4R  
448 signalling (**Figure 5G & Supplementary Figure 5F**), as were key EGR2-dependent  
449 phenotypic traits, such as SiglecF and EpCAM expression (**Supplementary Figure 5F**). TGF-  
450  $\beta$  has recently been shown to be crucial for the development of alveolar macrophages (11)  
451 and thus we next explored if the TGF- $\beta$ -TGF- $\beta$ R axis drives expression of EGR2. To do so,  
452 we generated a new mouse line by crossing *Fcgr1*<sup>iCre</sup> mice to mice with LoxP sites flanking  
453 the *Tgfbr2* allele (*Tgfbr2*<sup>fl/fl</sup>). Consistent with the crucial role for TGF- $\beta$ R in controlling alveolar  
454 macrophage development (11), there was a paucity of alveolar macrophages in the lungs of  
455 neonatal *Fcgr1*<sup>iCre/+</sup>.*Tgfbr2*<sup>fl/fl</sup> compared with *Fcgr1*<sup>+/+</sup>.*Tgfbr2*<sup>fl/fl</sup> and *Fcgr1*<sup>iCre/+</sup>.*Tgfbr2*<sup>fl/+</sup> controls  
456 (**Figure 5H**). Strikingly, while CD11c<sup>+</sup>CD11b<sup>lo</sup> alveolar macrophages expressed high levels of  
457 EGR2 in control groups, EGR2 expression was largely abolished in *Fcgr1*<sup>iCre/+</sup>.*Tgfbr2*<sup>fl/fl</sup> mice,  
458 demonstrating that TGF- $\beta$ R signalling is vital for EGR2 induction *in vivo*. As *Fcgr1*<sup>iCre/+</sup>.*Tgfbr2*<sup>fl/fl</sup>  
459 developed fatal seizures between d14 and d21 of age, perhaps reflecting the indispensable  
460 role for TGF- $\beta$ R in controlling microglia activity (37-39), we were unable to carry out further  
461 analyses using this strain.

462 Given the central role for CSF-2 in alveolar macrophage development, we also  
463 assessed the role of CSF-2 in driving EGR2 expression using an *in vitro* culture system in  
464 which Ly6C<sup>hi</sup> monocytes from mouse bone marrow were FACS-purified and cultured with  
465 recombinant CSF-1 or CSF-2. This revealed that CSF-2 was also capable of driving EGR2  
466 expression in this system (**Figure 5I**). Given that CSF-2R and TGF- $\beta$ R signalling is known to  
467 induce expression of PPAR- $\gamma$  (9, 11), we next determined if PPAR- $\gamma$  (encoded by *Pparg*) is  
468 upstream of EGR2. Analysis of a published dataset comparing the transcriptional profile of  
469 *Pparg*-sufficient and -deficient lung macrophages revealed significant downregulation (2.1-  
470 fold change) of *Egr2* in the context of *Pparg* deficiency (**Figure 5j**). In contrast, *Pparg*



471 expression was unaffected in alveolar macrophages from *Ly2<sup>Cre</sup>.Egr2<sup>fl/fl</sup>* mice (**Figure 5K**),  
 472 suggesting EGR2 is downstream of PPAR- $\gamma$ . Another transcription factor implicated in  
 473 controlling alveolar macrophage differentiation is C/EBP $\beta$  (14) and EGR2 has been shown to  
 474 modulate C/EBP $\beta$  *in vitro* (33). In our hands, *Egr2*-deficiency led to reduced expression of  
 475 C/EBP $\beta$  at mRNA (**Figure 5K**) and protein level (**Supplementary Figure 5G**). Taken together,  
 476 these data support the premise that EGR2 expression by alveolar macrophages is induced by  
 477 TGF- $\beta$  and CSF-2 in a PPAR- $\gamma$ -dependent manner in the neonatal period and this in turn  
 478 induces expression of C/EBP $\beta$  to drive tissue-specific differentiation.

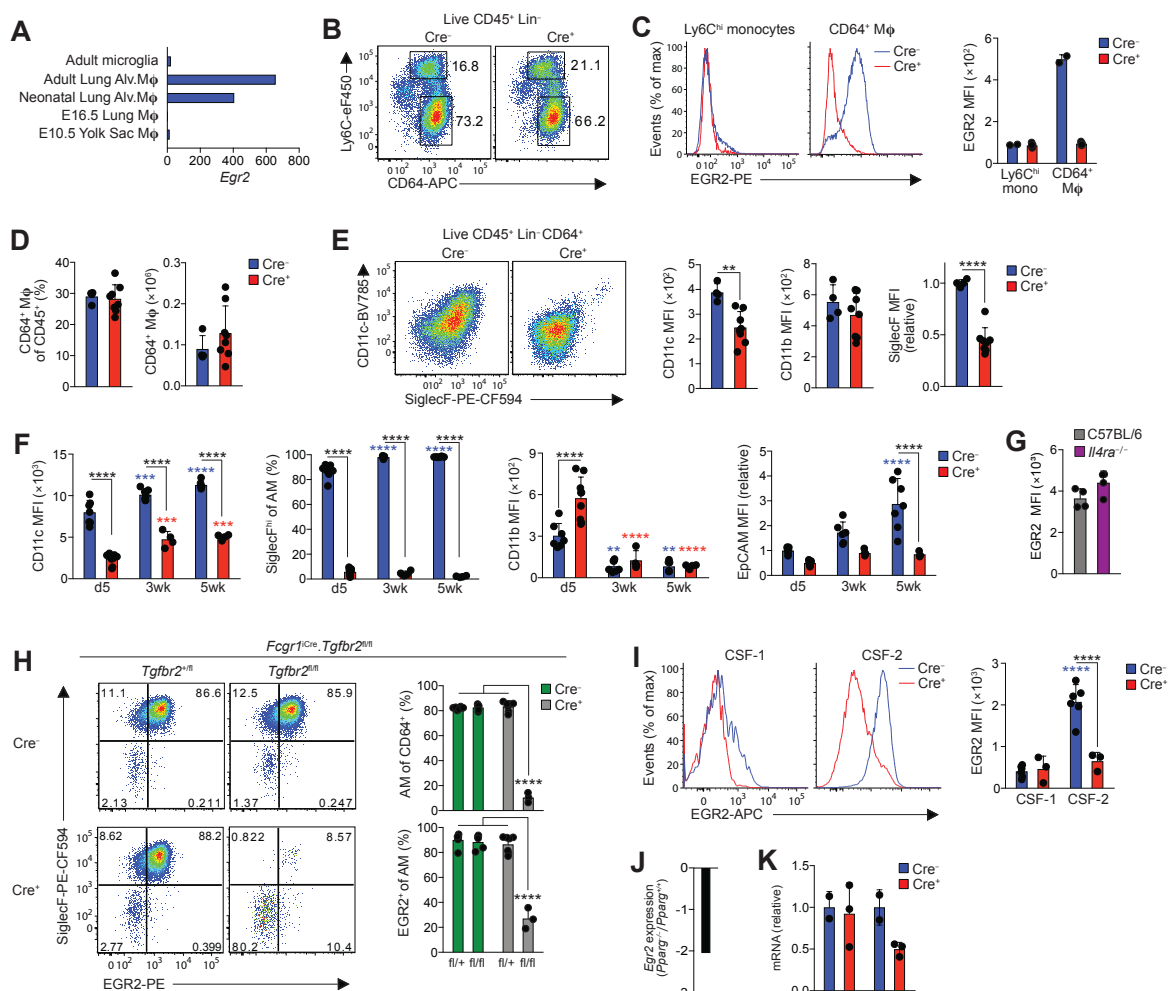

479

## 480 **Figure 5: TGF $\beta$ and CSF2 drive EGR2 expression**

481 **A.** Normalised expression (by DESeq2) of *Egr2* by the indicated populations (data obtained from the  
 482 Immgen Consortium).

483 **B.** Representative expression of Ly6C and CD64 by live CD45<sup>+</sup>CD3<sup>-</sup>CD19<sup>-</sup>Ly6G<sup>-</sup> cells from the lungs  
 484 of unmanipulated newborn Cre<sup>-</sup> (*Egr2<sup>fl/fl</sup>*) or Cre<sup>+</sup> (*Ly2<sup>Cre</sup>.Egr2<sup>fl/fl</sup>*) mice. Data are pooled from one of  
 485 two independent experiments performed.

- 486 **C.** Histograms show representative expression of EGR2 by CD64<sup>+</sup> 'pre-alveolar macrophages' and  
487 Ly6C<sup>hi</sup> monocytes from the lungs of unmanipulated newborn Cre<sup>-</sup> (*Egr2<sup>fl/fl</sup>*) or Cre<sup>+</sup> (*Lyz2<sup>Cre/+</sup>.Egr2<sup>fl/fl</sup>*)  
488 mice and bar chart shows the mean fluorescent intensity (MFI) of EGR2 expression by these cells.
- 489 **D.** Frequency and absolute number of CD64<sup>+</sup> 'pre-alveolar macrophages' from mice in **B**. Symbols  
490 represent individual mice. Data are pooled from two independent experiments with 4 (Cre<sup>-</sup>) or 8 (Cre<sup>+</sup>)  
491 mice per group.
- 492 **E.** FACS plots show representative expression of CD11c and SiglecF by CD64<sup>+</sup> 'pre-alveolar  
493 macrophages' from mice in **B** and bar chart shows the MFI of CD11c, SiglecF and CD11b expression  
494 by these cells. Symbols represent individual mice. Data are pooled from two independent experiments  
495 with 4 (Cre<sup>-</sup>) or 8 (Cre<sup>+</sup>) mice per group. Unpaired Student's *t*-test, \*\**p*<0.01, \*\*\*\**p*<0.0001
- 496 **F.** MFI of CD11c, SiglecF, CD11b and EpCAM (relative to d5 Cre<sup>-</sup> cells) expression by CD11c<sup>hi</sup>CD11b<sup>lo</sup>  
497 alveolar macrophages obtained from unmanipulated *Egr2<sup>fl/fl</sup>* (Cre<sup>-</sup>) or *Lyz2<sup>Cre</sup>.Egr2<sup>fl/fl</sup>* (Cre<sup>+</sup>) mice at the  
498 indicated ages. Symbols represent individual mice. Coloured \* denote significance between d5 and 3  
499 and 5 weeks within the Cre<sup>-</sup> (blue) and Cre<sup>+</sup> (red) data. Data are pooled from two independent  
500 experiments with 4-9 mice per group. Two-way ANOVA with Tukey's multiple comparisons test,  
501 \*\*\*\**p*<0.0001
- 502 **G.** Representative expression of EGR2 by alveolar macrophages from adult WT (C57BL/6J) and *Il4ra<sup>-</sup>*  
503 <sup>-</sup> adult mice. Data from one experiment with 4 mice per group.
- 504 **H.** Representative expression of EGR2 and SiglecF by CD11c<sup>hi</sup>CD11b<sup>lo</sup> alveolar macrophages obtained  
505 from lungs of neonatal (d8) *Fcgr1<sup>iCre</sup>.Tgfb2<sup>fl/fl</sup>* and Cre<sup>-</sup> and *Tgfb2<sup>fl/+</sup>* littermate controls. Bar charts show  
506 the mean frequencies of CD11c<sup>hi</sup>CD11b<sup>lo</sup> alveolar macrophages of all Ly6C<sup>lo</sup>CD64<sup>+</sup> cells (*upper*) and  
507 EGR2<sup>+</sup> cells amongst CD11c<sup>hi</sup>CD11b<sup>lo</sup> alveolar macrophages (*lower*). Symbols represent individual  
508 mice. Data are pooled from two independent experiments with 3-7 mice per group. \*\*\*\* *p*<0.0001 (One-  
509 way ANOVA followed by Tukey's multiple comparisons post-test).
- 510 **I.** Representative expression of EGR2 (*left*) and MFI of EGR2 (*right*) by FACS-purified Ly6C<sup>hi</sup>  
511 monocytes cultured *in vitro* with recombinant CSF-1 (20ng/ml) or CSF-2 (20ng/ml) for five days.  
512 Symbols represent monocytes isolated from individual mice and horizontal lines represent the mean.  
513 Data are from 6 Cre<sup>-</sup> (*Egr2<sup>fl/fl</sup>*) or 3 Cre<sup>+</sup> (*Lyz2<sup>Cre</sup>.Egr2<sup>fl/fl</sup>*) mice per group pooled from two independents  
514 experiment. Two-way ANOVA followed by Tukey's multiple comparisons post-test, \*\*\*\* *p*<0.0001.  
515 Coloured \* denote significance between CSF-1 and CSF-2 within the Cre<sup>-</sup> (blue) and Cre<sup>+</sup> (red) data.
- 516 **J.** Relative expression of *Egr2* by alveolar macrophages obtained from *Pparg<sup>fl/fl</sup>* or *Itgax<sup>Cre</sup>.Pparg<sup>fl/fl</sup>* mice  
517 from (9).
- 518 **K.** qPCR analysis of *Pparg* and *Cebpb* mRNA by BAL cells from unmanipulated adult *Egr2<sup>fl/fl</sup>* (Cre<sup>-</sup>) or  
519 *Lyz2<sup>Cre</sup>.Egr2<sup>fl/fl</sup>* (Cre<sup>+</sup>) mice. Data represent 2 *Egr2<sup>fl/fl</sup>* (Cre<sup>-</sup>) or 4 *Lyz2<sup>Cre</sup>.Egr2<sup>fl/fl</sup>* (Cre<sup>+</sup>) mice per group.

520

521

## 522 ***Egr2* deficiency confers a competitive disadvantage on alveolar macrophages**

523 Given the observation that EGR2-sufficient alveolar macrophages come to dominate the  
524 *Lyz2<sup>Cre</sup>.Egr2<sup>fl/fl</sup>* (Cre<sup>+</sup>) mice airspace, we next set out to determine if EGR2 deletion confers an  
525 intrinsic competitive disadvantage on alveolar macrophages. To this end, we generated mixed  
526 bone marrow chimeric mice by reconstituting lethally irradiated WT (CD45.1<sup>+/.</sup>2<sup>+</sup>) mice with a  
527 1:1 ratio of WT (CD45.1<sup>+</sup>) and either Cre<sup>-</sup> (*Egr2<sup>fl/fl</sup>*) or Cre<sup>+</sup> (*Lyz2<sup>Cre</sup>.Egr2<sup>fl/fl</sup>*) (CD45.2<sup>+</sup>) bone  
528 marrow cells (**Figure 6A**). 8 weeks after reconstitution, we found that *Egr2* deficient (Cre<sup>+</sup>)  
529 and *Egr2* sufficient (Cre<sup>-</sup>) bone marrow contributed equally to blood monocytes and  
530 neutrophils (data not shown), as they did to the pools of monocytes, interstitial macrophages



531 and dendritic cell subsets in the lung (**Figure 6B, C**). In contrast, alveolar macrophages were  
 532 derived almost exclusively from WT BM in WT:Cre<sup>+</sup> chimeric mice, whereas they were derived  
 533 equally from both BM sources in WT:Cre<sup>-</sup> chimeric mice (**Figure 6B-D**). The mixed BM  
 534 chimeric model also confirmed that the phenotypic and morphologic differences seen in intact  
 535 *Lyz2*<sup>Cre</sup>.*Egr2*<sup>fl/fl</sup> mice were due to cell intrinsic loss of EGR2, rather than effects of *Egr2*  
 536 deficiency on the lung environment (**Figure 6E, F**). We also used this system to confirm the  
 537 reduced expression of C/EBP $\beta$  by alveolar macrophages deriving from *Lyz2*<sup>Cre</sup>.*Egr2*<sup>fl/fl</sup> (Cre<sup>+</sup>)  
 538 bone marrow (**Figure 6F**). Taken together, these results demonstrate that cell intrinsic EGR2  
 539 is indispensable for the differentiation of alveolar macrophages and repopulation of the  
 540 alveolar niche following radiation-induced depletion.

541

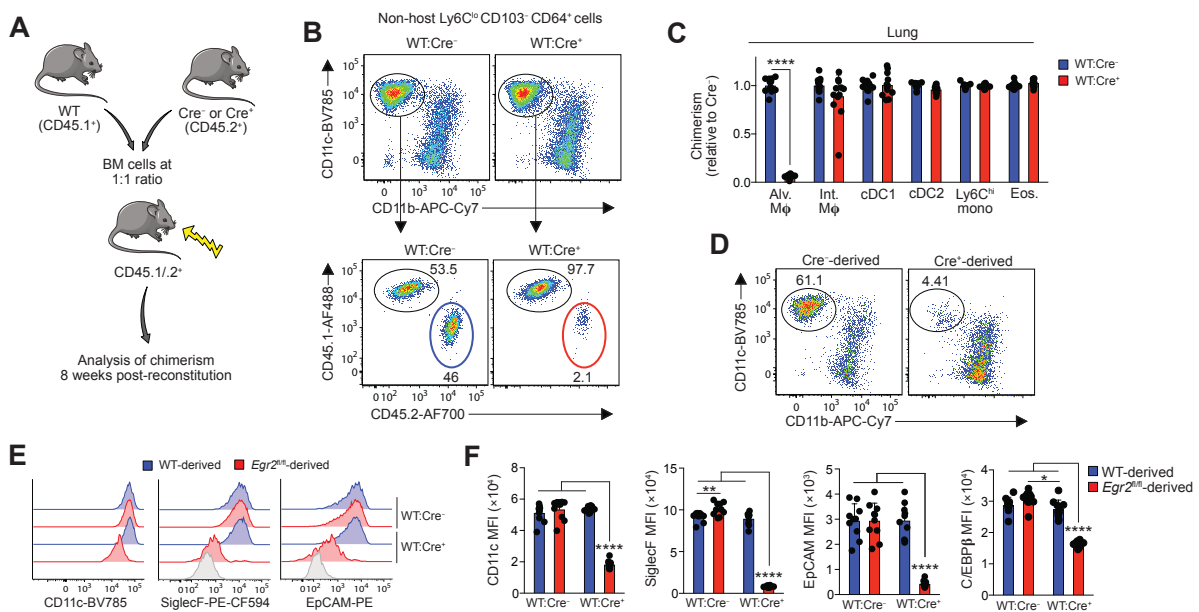

542

543 **Figure 6: *Egr2* deficiency confers a competitive disadvantage on alveolar macrophages**

544 **A.** Schematic of the generation of mixed bone marrow chimeric mice using Cre<sup>-</sup> (*Egr2*<sup>fl/fl</sup>) or Cre<sup>+</sup>  
 545 (*Lyz2*<sup>Cre</sup>.*Egr2*<sup>fl/fl</sup>) mice as donors.

546 **B.** Representative expression of CD11c and CD11b by Ly6C<sup>lo</sup>CD64<sup>+</sup> macrophages amongst live  
 547 CD45<sup>+</sup>CD3<sup>-</sup>CD19<sup>-</sup>Ly6G<sup>-</sup>CD103<sup>-</sup> cells (*upper panels*) and representative expression of CD45.1 and  
 548 CD45.2 by CD11c<sup>hi</sup>CD11b<sup>lo</sup> alveolar macrophages (*lower panels*) from WT:Cre<sup>-</sup> or WT:Cre<sup>+</sup>  
 549 chimeric mice.

550 **C.** Contribution of *Egr2*<sup>fl/fl</sup> BM to the indicated lung myeloid populations in WT:Cre<sup>+</sup> chimeric  
 551 mice relative to WT:Cre<sup>-</sup> mice. Chimerism was normalised to Ly6C<sup>hi</sup> blood monocytes before normalisation  
 552 of Cre<sup>+</sup> to Cre<sup>-</sup>. Symbols represent individual mice. Data are from 12 (WT:Cre<sup>+</sup>) or 13 (WT:Cre<sup>-</sup>) mice  
 553 per group pooled from two independent experiments. Student's *t*-test with Holm-Sidak correction, \*\*\*\*  
 554 *p*<0.0001.

555 **D.** Representative composition of the CD64<sup>+</sup> macrophage compartment deriving from Cre<sup>-</sup> or Cre<sup>+</sup> bone  
556 marrow in WT:Cre<sup>-</sup> or WT:Cre<sup>+</sup> chimeric mice.

557 **E.** Representative expression of CD11c, SiglecF and EpCAM by WT- and *Egr2*<sup>fl/fl</sup>-derived alveolar  
558 macrophages in WT:Cre<sup>-</sup> or WT:Cre<sup>+</sup> chimeric mice. Shaded histograms represent FMO controls.

559 **F.** Mean fluorescent intensity (MFI) of CD11c, SiglecF, EpCAM and C/EBP $\beta$  expression by WT- and  
560 *Egr2*<sup>fl/fl</sup>-derived alveolar macrophages in WT:Cre<sup>-</sup> or WT:Cre<sup>+</sup> chimeric mice. Symbols represent  
561 individual mice. Data are from 10 mice per group from one experiment of two performed. One-way  
562 ANOVA followed by Tukey's multiple comparisons post-test, \*\*\*\* p<0.0001.

563  
564  
565

566 **Bone marrow-derived monocytes replenish the alveolar macrophage niche following**

567 **lung injury**

568 Loss of tissue resident macrophages is a frequent consequence of inflammation, including in  
569 the lung (39). Thus, given that *Egr2*-deficient macrophages failed to replenish the alveolar  
570 niche following radiation treatment, we next sought to determine if EGR2 plays a role in  
571 macrophage repopulation following lung injury. The chemotherapeutic agent bleomycin is a  
572 common model of chronic lung injury and self-resolving pulmonary fibrosis (40), which is  
573 characterised by initial loss of alveolar macrophages during the inflammatory phase (day 7),  
574 followed by repopulation during the fibrotic and resolution phases (from day 14 onwards)  
575 (**Figure 7A**). Post-injury repopulation of macrophages can occur via two mechanisms: *in situ*  
576 proliferation of resident cells and/or replenishment by bone marrow-derived monocytes. To  
577 determine if bone marrow-derived monocytes contribute to the alveolar macrophage  
578 compartment following bleomycin-induced injury, we used tissue protected bone marrow  
579 chimeric mice to assess replenishment kinetics without exposing the lung to the additional  
580 insult of ionising radiation (**Figure 7B**). Consistent with previous studies (41), we found that  
581 bleomycin instillation led to progressive replacement of resident alveolar macrophages by BM-  
582 derived cells, with the entire alveolar macrophage compartment being replaced at 32 weeks  
583 post injury (**Figure 7B**). Interestingly, recently arrived, monocyte-derived alveolar  
584 macrophages expressed low-intermediate levels of SiglecF, with acquisition of SiglecF  
585 requiring long-term residence in the airway (**Figure 7C**).

586 We next interrogated this process further to determine if interstitial macrophages that  
587 accumulate in the lung parenchyma during injury can subsequently mature into alveolar

588 macrophages during tissue repair (41, 42). Indeed, during the recovery phase of disease, we  
589 noted the presence of cells with features of both alveolar and interstitial macrophages  
590 (CD11c<sup>hi</sup>CD11b<sup>+</sup> MHCII<sup>+</sup>CD64<sup>hi</sup>) in the BAL fluid (**Figure 7D**), and these cells expressed  
591 intermediate levels of SiglecF (**Figure 7E**), indicative of recent monocyte origin. To examine  
592 the relationship of these intermediate cells to interstitial macrophages more directly, we  
593 performed fate mapping studies using *Cx3cr1*<sup>Cre-ERT2/+</sup>.*Rosa26*<sup>LSL-RFP/+</sup> reporter mice, in which  
594 administration of tamoxifen leads to irreversible expression of RFP by CX3CR1 expressing  
595 cells (43, 44) (**Figure 7F**). Interstitial macrophages are characterised by high expression of  
596 CX3CR1 and administration of tamoxifen led to labelling of 40-50% of interstitial macrophages  
597 in both healthy lung and at d21 post bleomycin administration (**Figure 7F**). No recombination  
598 was seen in *Cx3cr1*<sup>Cre-ERT2/+</sup>.*Rosa26*<sup>LSL-RFP/+</sup> mice in the absence of tamoxifen  
599 (**Supplementary Figure 6A**). Although very low levels of recombination were detected in  
600 control alveolar macrophages, a clear population of RFP<sup>+</sup> cells could be detected in the BAL  
601 of the recipients of bleomycin following tamoxifen treatment (**Figure 7F**). As monocytes are  
602 poorly labelled in this system and *Cx3cr1* levels did not change in *bona fide* resident alveolar  
603 macrophages in response to bleomycin treatment (**Supplementary Figure 6B**), these RFP<sup>+</sup>  
604 cells must represent fate-mapped, monocyte-derived CX3CR1<sup>+</sup> cells. In line with this, RFP<sup>+</sup>  
605 cells had the 'hybrid' alveolar/interstitial CD11c<sup>hi</sup>CD11b<sup>+</sup>SiglecF<sup>int</sup> profile, supporting the idea  
606 that these represent transitional cells (**Figure 7F**). Thus, following bleomycin-induced injury,  
607 the alveolar macrophage compartment is restored by monocytes that transition through a  
608 CX3CR1<sup>hi</sup> state.

609

610

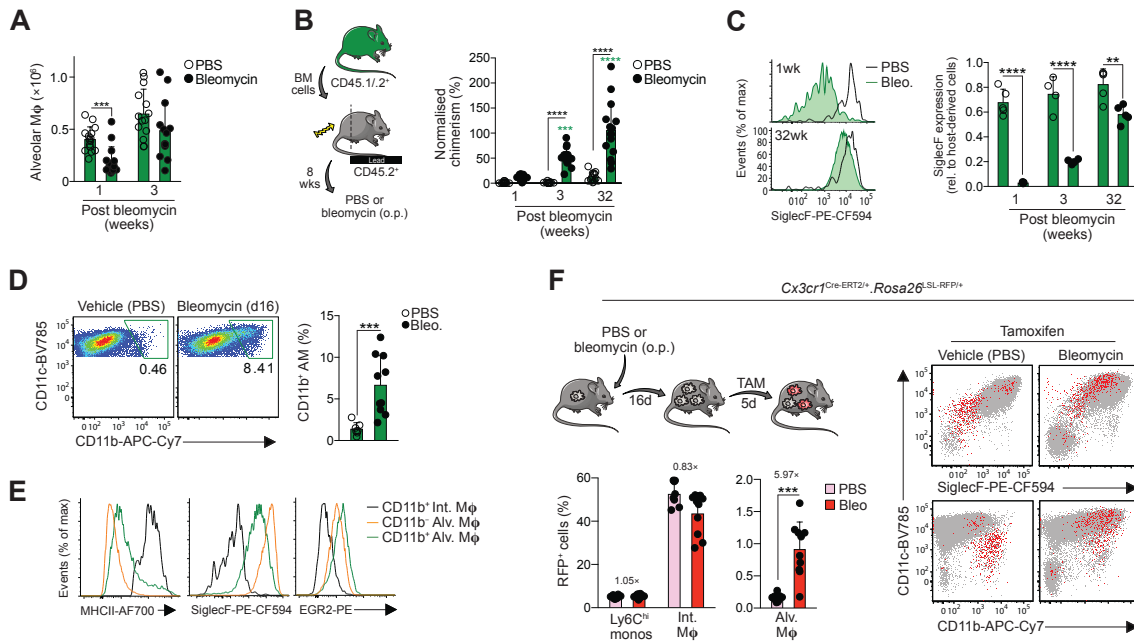

611

612 **Figure 7: Monocyte-derived, CX3CR1<sup>+</sup> interstitial macrophages can replenish the alveolar**  
 613 **macrophage niche following injury**

614 **A.** Absolute numbers of alveolar macrophages 1- and 3-weeks following bleomycin administration or  
 615 PBS vehicle control. Symbols represent individual mice and error is S.D. Data are pooled from two  
 616 independent experiments at each time point with 13-15 mice per group. Student's *t* test with Holm-Sidak  
 617 correction, \*\*\**p*<0.001.

618 **B.** Non-host chimerism of alveolar macrophages in tissue protected bone marrow chimeric mice at 1-,  
 619 3- or 32-weeks following administration of bleomycin or PBS vehicle control. Chimerism is normalised  
 620 to Ly6C<sup>hi</sup> blood monocytes. Symbols represent individual mice and error is S.D. Data are pooled from  
 621 two independent experiments at each time point with 13-15 mice per group. Two-way ANOVA with  
 622 Tukey's multiple comparisons test. \*\*\**p*<0.001, \*\*\*\**p*<0.0001.

623 **C.** Expression of SiglecF by CD11c<sup>hi</sup>CD11b<sup>lo</sup> alveolar macrophages from the lung of mice in **B.** at 1  
 624 week and 32 weeks post bleomycin or PBS administration. Symbols represent individual mice and error  
 625 is S.D. Data are from one of two independent experiments at each time point with 4 mice per group.  
 626 Two-way ANOVA with Tukey's multiple comparisons test. \*\**p*<0.01, \*\*\*\**p*<0.0001.

627 **D.** Representative expression of CD11c and CD11b by CD11c<sup>hi</sup>CD64<sup>+</sup> cells obtained by BAL from WT  
 628 mice two weeks after instillation of bleomycin or vehicle control (*left*). Graph shows the mean frequency  
 629 of CD11b<sup>+</sup> alveolar macrophages (*right*). Symbols represent individual mice and error is S.D. Data are  
 630 pooled from two independent experiments with 7 (Cre<sup>-</sup>) or 10 (Cre<sup>+</sup>) mice per group. Mann Whitney  
 631 test, \*\*\**p*<0.001.

632 **E.** Representative expression of MHCII, SiglecF and EGR2 by CD11b<sup>+</sup> interstitial macrophages and  
 633 CD11b-defined CD11c<sup>hi</sup> alveolar macrophages from mice in **D.**

634 **F.** Experimental scheme for the induction of lung injury and tamoxifen administration in *Cx3cr1*<sup>Cre</sup>-  
 635 *Ert2*<sup>+/+</sup>.*Rosa26*<sup>LSL-RFP/+</sup> fate mapping mice. Lower graphs show the levels of recombination in Ly6C<sup>hi</sup>  
 636 monocytes, CD64<sup>+</sup> interstitial macrophages and alveolar macrophages from *Cx3cr1*<sup>Cre-Ert2</sup><sup>+/+</sup>.*Rosa26*<sup>LSL-</sup>  
 637 *RFP/+* mice administered bleomycin or vehicle control. Representative expression of CD11c, SiglecF and  
 638 CD11b by RFP<sup>+</sup> (red) or RFP<sup>-</sup> (grey) cells present in the BAL fluid of *Cx3cr1*<sup>Cre-Ert2</sup><sup>+/+</sup>.*Rosa26*<sup>LSL-RFP/+</sup>  
 639 mice 3 weeks after bleomycin or vehicle instillation. Graphs show the mean fluorescent intensity (MFI)  
 640 of CD11c and SiglecF expression by RFP<sup>+</sup> cells. Symbols represent individual mice and error is S.D.  
 641 Mann Whitney test, \*\*\**p*<0.001.

642

643 **EGR2 is indispensable for alveolar macrophage repopulation and tissue repair**  
644 **following lung injury**

645 Given that transitional CD11b<sup>+</sup>SiglecF<sup>int</sup> cells also expressed EGR2, contrasting with its  
646 restriction to SiglecF<sup>hi</sup> alveolar macrophages in health (**Figure 7E**), we examined whether  
647 EGR2 is necessary for the replenishment of the alveolar niche during recovery from  
648 bleomycin-induced injury. To do this, we administered bleomycin to *Lyz2<sup>Cre</sup>.Egr2<sup>fl/fl</sup>* mice and  
649 their Cre<sup>-</sup> littermates and assessed macrophage dynamics in total lung digests. The  
650 inflammatory phase of this disorder (day 7) was associated with accumulation of CD11b<sup>+</sup>  
651 macrophages and this occurred to the same extent in Cre<sup>-</sup> and Cre<sup>+</sup> mice (**Figure 8A, B**).  
652 Consistent with recent reports (45), the CD11b<sup>+</sup>CD64<sup>+</sup> interstitial macrophage population was  
653 heterogeneous during the fibrotic phase of disease (d14-d21), with MHCII<sup>+</sup> and  
654 MHCII<sup>lo</sup>CD36<sup>+</sup>Lyve1<sup>+</sup> subsets. This pattern was identical in between Cre<sup>-</sup> and Cre<sup>+</sup> groups  
655 (**Supplementary Figure 7A, C**), as were the numbers of Ly6C<sup>hi</sup> monocytes and neutrophils  
656 (**Supplementary Figure 7A, B**). We did however detect a significant reduction in eosinophils  
657 in the lung of *Lyz2<sup>Cre</sup>.Egr2<sup>fl/fl</sup>* mice compared with Cre<sup>-</sup> littermates, despite eosinophils lacking  
658 EGR2 expression (**Supplementary Figure 7D, E**).

659 A reduction in alveolar macrophages was observed in both groups on day 7 after  
660 administration of bleomycin. Although this began to be restored by day 14 in Cre<sup>-</sup> (*Egr2<sup>fl/fl</sup>*)  
661 control mice, this did not occur in Cre<sup>+</sup> (*Lyz2<sup>Cre</sup>.Egr2<sup>fl/fl</sup>*) mice and indeed, the alveolar  
662 macrophage compartment remained significantly reduced in Cre<sup>+</sup> mice compared with Cre<sup>-</sup>  
663 littermates even after 6 weeks (**Figure 8A-C**), suggesting EGR2 is indispensable for the  
664 repopulation of the alveolar macrophage niche following bleomycin-induced injury. The lack  
665 of repopulation in Cre<sup>+</sup> mice did not appear to reflect an inability of *Egr2* deficient macrophages  
666 to proliferate, as the proportion of Ki67<sup>+</sup> proliferating cells was equivalent in Cre<sup>-</sup> and Cre<sup>+</sup> mice  
667 (**Figure 8D**). Equally, this also did not reflect a lack of chemoattractants in the airways to  
668 recruit monocyte-derived cells, as both CCL2 and CCL7 were actually elevated in Cre<sup>+</sup> mice  
669 compared with Cre<sup>-</sup> littermates (**Figure 8E**). Similarly, CSF2 levels were elevated in the BAL  
670 fluid of Cre<sup>+</sup> mice, ruling out the possibility that lack of appropriate growth factors is responsible

671 for defective alveolar macrophage differentiation in the absence of EGR2 (**Figure 8E**). Instead,  
672 these data suggested that *Egr2* deficiency led to an intrinsic inability of bone marrow-derived  
673 cells to repopulate the macrophage niche. To test this directly, we crossed *Cx3cr1*<sup>Cre-</sup>  
674 *ERT2*<sup>+</sup>.*Rosa26*<sup>LSL-RFP/+</sup> mice with *Egr2*<sup>fl/fl</sup> mice to allow for temporal RFP labelling of CX3CR1-  
675 expressing cells and *Egr2* deficiency in the same animal. We administered tamoxifen during  
676 the period of alveolar macrophage reconstitution (d16 to d21) and assessed the presence of  
677 RFP-labelled cells amongst alveolar macrophages. Compared with tamoxifen-treated controls  
678 (*Cx3cr1*<sup>Cre-ERT2/+</sup>.*Rosa26*<sup>LSL-RFP/+</sup>.*Egr2*<sup>+/+</sup> or *Cx3cr1*<sup>Cre-ERT2/+</sup>.*Rosa26*<sup>LSL-RFP/+</sup>.*Egr2*<sup>fl/+</sup> mice), we  
679 found a marked reduction in the frequency of RFP<sup>+</sup> alveolar macrophages in the BAL of  
680 tamoxifen treated *Cx3cr1*<sup>Cre-ERT2/+</sup>.*Rosa26*<sup>LSL-RFP/+</sup>.*Egr2*<sup>fl/fl</sup> mice during lung repair (**Figure 8F**),  
681 demonstrating that EGR2 controls the post-injury repopulation of the alveolar macrophage  
682 compartment by CX3CR1<sup>+</sup> cells.

683 To determine the consequence of the failure of *Egr2* deficient cells to reconstitute the  
684 alveolar niche, we assessed the fibrotic response and subsequent repair processes in  
685 *Lyz2*<sup>Cre</sup>.*Egr2*<sup>fl/fl</sup> mice. Notably, we did not detect differences in the degree of fibrosis or  
686 expression of key genes associated with fibrosis, including *Col3a1* and *Pdgfrb* between  
687 untreated *Lyz2*<sup>Cre</sup>.*Egr2*<sup>fl/fl</sup> mice and their *Egr2*<sup>fl/fl</sup> littermate controls at day 21, a time considered  
688 'peak' fibrosis (**Figure 8H, Supplementary Figure 8A, B**). However, analysis at 6 weeks post  
689 bleomycin showed that whereas the Cre<sup>-</sup> mice had largely repaired their lungs, Cre<sup>+</sup> mice had  
690 defective repair evidenced by persistent fibrosis and architectural damage (**Figure 8G, H,**  
691 **Supplementary Figure 8A**). This was paralleled by elevated numbers of macrophages in the  
692 lung parenchyma (**Figure 8I, Supplementary Figure 8A**) and parenchymal macrophage  
693 persistence correlated with the degree of fibrosis (**Supplementary Figure 8C**). Furthermore,  
694 homeostasis failed to be restored in the airways. Flow cytometric analysis of BAL fluid  
695 revealed that CD45<sup>+</sup> leukocytes comprised only 10% of all events in Cre<sup>+</sup> mice compared with  
696 ~60% in their Cre<sup>-</sup> littermates (**Figure 8J**). The vast majority of the CD45<sup>-</sup> fraction failed to  
697 express signature markers for cells of epithelial, endothelial or fibroblast origin, suggesting  
698 this may represent cellular debris, which could also be found amongst lung digests



699 (Supplementary Figure 9A, B). This was paralleled by elevated BAL fluid protein levels and  
 700 turbidity in the Cre<sup>+</sup> mice compared with Cre<sup>-</sup> controls, suggesting that the inability to replenish  
 701 the alveolar macrophage niche following injury was associated with the development of  
 702 alveolar proteinosis (Figure 8K). Thus, loss of EGR2-dependent, monocyte-derived alveolar  
 703 macrophages leads to defective tissue repair, persistent cellular damage and failed restoration  
 704 of lung homeostasis.

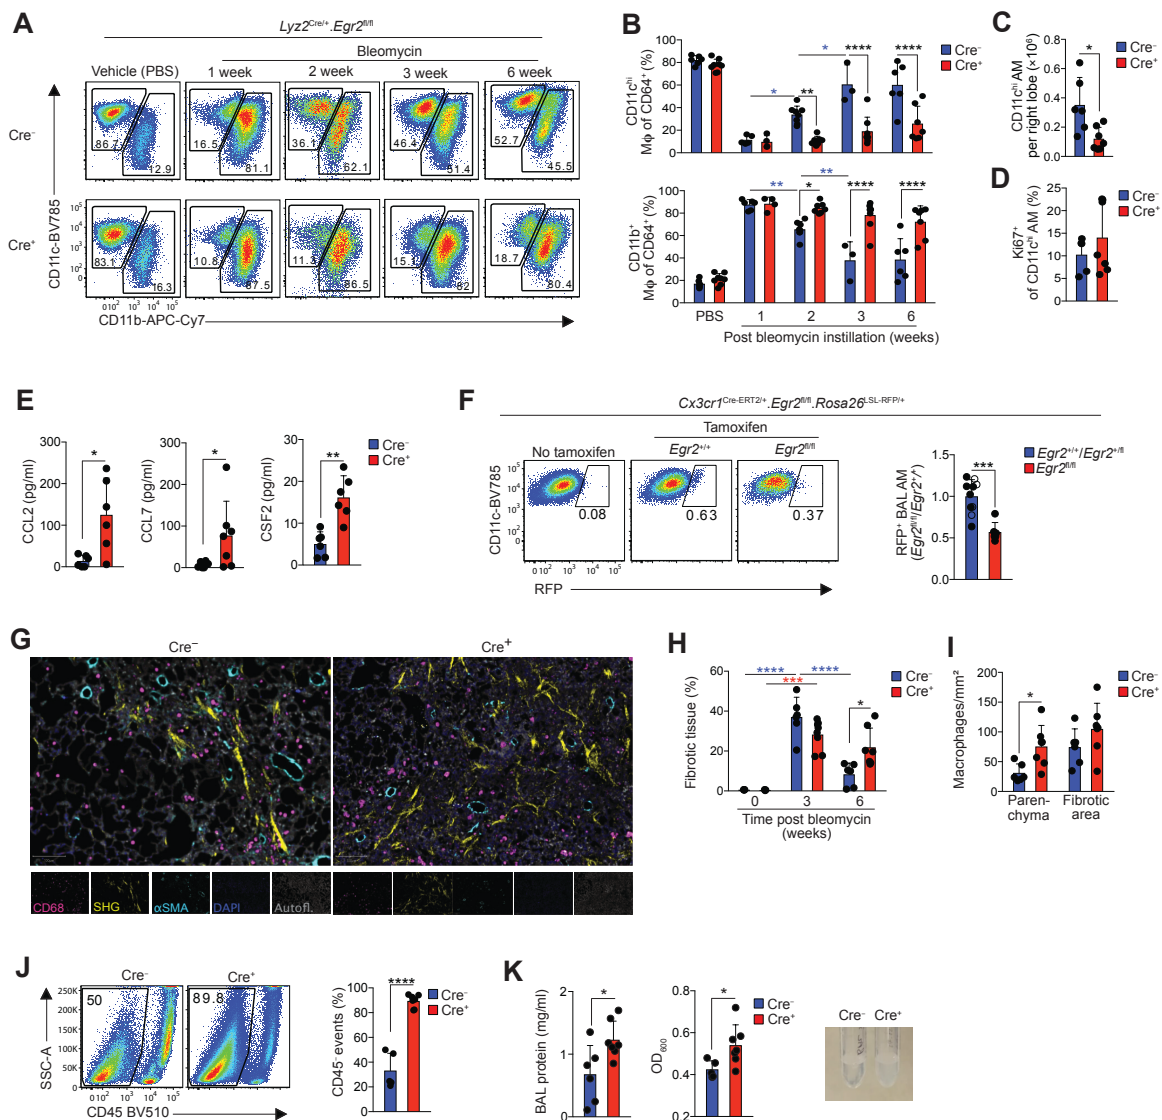

705

706

707

708 **Figure 8: EGR2 is indispensable for the repopulation of the alveolar macrophage niche and**  
 709 **tissue repair following lung injury**

710

711 **A.** Representative expression of CD11c and CD11b by live CD45<sup>+</sup>CD3<sup>-</sup>CD19<sup>-</sup>Ly6G<sup>-</sup>CD64<sup>+</sup> cells from  
 712 the lungs of *Egr2<sup>fl/fl</sup>* (Cre<sup>-</sup>) and *Lyz2<sup>Cre/+</sup>.Egr2<sup>fl/fl</sup>* (Cre<sup>+</sup>) mice at 1, 2, 3 or 6 weeks post bleomycin or  
 713 vehicle controls.

714 **B.** Frequency of CD11c<sup>hi</sup>CD11b<sup>lo</sup> alveolar macrophages and CD11c<sup>var</sup>CD11b<sup>+</sup> cells from mice in **A.**  
 715 Symbols represent individual mice and error is the S.D. Data are pooled from at least two independent

716 experiments at each time point with 3-7 mice per group. Two-way ANOVA with Tukey's multiple  
717 comparisons test, \* $p < 0.05$ . \*\* $p < 0.01$ ,  $p < 0.001$ , \*\*\*\* $p < 0.0001$

718 **C.** Absolute number of CD11c<sup>hi</sup>CD11b<sup>lo</sup> alveolar macrophages in lungs six weeks post bleomycin  
719 instillation. Symbols represent individual mice and error is the S.D. Data are pooled from two  
720 independent experiments with 6 (Cre<sup>-</sup>) or 7 (Cre<sup>+</sup>) mice per group. Mann Whitney test, \* $p < 0.05$ .

721 **D.** Frequency of Ki67<sup>+</sup> CD11c<sup>hi</sup>CD11b<sup>lo</sup> alveolar macrophages in lungs six weeks post bleomycin  
722 instillation. Symbols represent individual mice and error is the S.D. Data are pooled from two  
723 independent experiments with 6 (Cre<sup>-</sup>) or 7 (Cre<sup>+</sup>) mice per group.

724 **E.** CCL2, CCL7 and CSF2 levels in BAL fluid obtained from *Egr2<sup>fl/fl</sup>* (Cre<sup>-</sup>) and *Lyz2<sup>Cre/+</sup>.Egr2<sup>fl/fl</sup>* (Cre<sup>+</sup>)  
725 mice six weeks post bleomycin instillation. Symbols represent individual mice and error is the S.D. Data  
726 are pooled from two independent experiments with 6 mice per group. Mann Whitney test (CCL2, CCL7),  
727 \* $p < 0.05$ , unpaired Student's t test (CSF2), \*\* $p < 0.01$ .

728 **F.** Representative expression of RFP by CD11c<sup>hi</sup>CD64<sup>+</sup> alveolar macrophages present in the BAL fluid  
729 of *Cx3cr1<sup>Cre-ERT2/+</sup>.Rosa26<sup>LSL-RFP/+</sup>.Egr2<sup>fl/fl</sup>* and their *Cx3cr1<sup>Cre-ERT2/+</sup>.Rosa26<sup>LSL-RFP/+</sup>.Egr2<sup>+/+</sup>* (open circles)  
730 or *Cx3cr1<sup>Cre-ERT2/+</sup>.Rosa26<sup>LSL-RFP/+</sup>.Egr2<sup>fl/+</sup>* (solid circles) controls 3 weeks following instillation of  
731 bleomycin or vehicle control. Graph shows the relative frequency of RFP<sup>+</sup> alveolar macrophages  
732 present in the BAL fluid. Symbols represent individual mice and error is the S.D. Data are pooled from  
733 two independent experiments at each time point with 10 (*Egr2<sup>+/+</sup>* [open symbols]/*Egr2<sup>fl/+</sup>* [filled symbols])  
734 or 6 (*Egr2<sup>fl/fl</sup>*) per group. Unpaired Student's t test, \*\*\* $p < 0.001$ .

735 **G.** 2-photon fluorescence imaging of lung tissue from adult *Egr2<sup>fl/fl</sup>* (Cre<sup>-</sup>) and *Lyz2<sup>Cre/+</sup>.Egr2<sup>fl/fl</sup>* (Cre<sup>+</sup>)  
736 mice 6 weeks following bleomycin administration. Sections were stained with CD68,  $\alpha$ SMA and DAPI.  
737 Autofluorescence is depicted in grey and collagen was detected by second harmonic generation (SHG).

738 **H.** Quantification of fibrotic score of lung tissue from *Egr2<sup>fl/fl</sup>* (Cre<sup>-</sup>) and *Lyz2<sup>Cre/+</sup>.Egr2<sup>fl/fl</sup>* (Cre<sup>+</sup>) 3 or 6  
739 weeks following bleomycin administration or PBS controls (from 3 week time point). See  
740 **Supplementary Figure 8**. Symbols represent individual mice and error is the S.D. Data are pooled  
741 from two independent experiments from one experiment with 6 (Cre<sup>-</sup>) or 7 (Cre<sup>+</sup>) mice per group. Two-  
742 way ANOVA followed by Tukey's multiple comparisons test, \* $p < 0.05$ , \*\* $p < 0.01$ , \*\*\* $p < 0.001$ ,  
743 \*\*\*\* $p < 0.0001$ .

744 **I.** Quantification of macrophage density in the parenchyma and fibrotic areas of lung tissue from *Egr2<sup>fl/fl</sup>*  
745 (Cre<sup>-</sup>) and *Lyz2<sup>Cre/+</sup>.Egr2<sup>fl/fl</sup>* (Cre<sup>+</sup>) 6 weeks following bleomycin administration. See **Supplementary**  
746 **Figure 8**. Symbols represent individual mice and error is the S.D. Data are pooled from two independent  
747 experiments with 6 (Cre<sup>-</sup>) or 7 (Cre<sup>+</sup>) mice per group. Student's t test with Holm-Sidak correction for  
748 multiple tests, \* $p < 0.05$ .

749 **J.** SSC-A profile and expression of CD45 by BAL obtained from *Egr2<sup>fl/fl</sup>* (Cre<sup>-</sup>) and *Lyz2<sup>Cre/+</sup>.Egr2<sup>fl/fl</sup>* (Cre<sup>+</sup>)  
750 6 weeks following bleomycin administration. Graph shows the mean frequency of CD45<sup>+</sup> cells amongst  
751 all live, single events. Symbols represent individual mice and error is the S.D. Data are pooled from two  
752 independent experiments with 5 (Cre<sup>-</sup>) or 7 (Cre<sup>+</sup>) mice per group. Unpaired Student's t test,  
753 \*\*\*\* $p < 0.0001$ .

754 **K.** Total protein concentration (*left*), turbidity (*centre*) and representative pictures (*right*) of BAL fluid  
755 from *Egr2<sup>fl/fl</sup>* (Cre<sup>-</sup>) and *Lyz2<sup>Cre/+</sup>.Egr2<sup>fl/fl</sup>* (Cre<sup>+</sup>) 6 weeks following bleomycin administration. Symbols  
756 represent individual mice. Data are pooled from two independent experiments from one experiment  
757 with 6 (Cre<sup>-</sup>) or 7 (Cre<sup>+</sup>) mice per group. Mann Whitney test, \* $p < 0.05$ .

758



## 759 Discussion

760 Given the multifaceted role of macrophages in tissue homeostasis, inflammation and tissue  
761 repair, as well as many chronic pathologies, understanding the environmental signals and the  
762 downstream molecular pathways that govern macrophage differentiation is a key objective in  
763 the field of immunology. Here, we identify the transcription factor EGR2 as a selective and  
764 indispensable part of the tissue-specific differentiation of lung alveolar macrophages.

765 Our transcriptomic analysis identified EGR2 as a feature of murine lung alveolar  
766 macrophages, a finding consistent with previous studies using bulk transcriptomics to  
767 compare macrophages from different tissues (1, 6) and a recent study using a similar scRNA-  
768 seq based approach, which identified EGR2 specifically upregulated in alveolar, and not  
769 interstitial, macrophages (46). Importantly, EGR2 is also expressed by alveolar macrophages  
770 in rats (47) and we showed that EGR2 is a feature of alveolar macrophages in man, a finding  
771 consistent with recent cross-species analysis (34). Thus, EGR2 appears to represent an  
772 evolutionarily conserved transcriptional regulator of alveolar macrophages.

773 While EGR2 has been implicated in controlling monocyte to macrophage differentiation  
774 in the past, these studies have often reached discrepant conclusions (19, 20, 34). This could  
775 reflect the fact that most studies examining the role of EGR2 in monocyte-macrophage  
776 differentiation have employed *in vitro* culture systems due to the postnatal lethality of global  
777 *Egr2* deficient mice (21, 22). By generating *Lyz2<sup>Cre</sup>.Egr2<sup>fl/fl</sup>* and *Fcgr1<sup>iCre</sup>.Egr2<sup>fl/fl</sup>* mice, we  
778 circumvented this lethality and allowed for myeloid- and macrophage-specific deletion of  
779 EGR2, respectively. Our analysis showed that only macrophages in the airways were affected  
780 by *Egr2* deletion and our transcriptional profiling and extensive phenotypic characterisation  
781 demonstrated that EGR2 controls a large proportion of the alveolar macrophage 'signature',  
782 including key phenotypic traits such as SiglecF, EpCAM and TREM1. This is consistent with  
783 recent epigenetic analysis showing an overrepresentation of EGR motifs in the genes defining  
784 alveolar macrophages (2, 46). Importantly, although previous work has suggested that there  
785 is redundancy between EGR family members, specifically EGR1 and EGR2, we found *Egr1*  
786 expression was unaffected by EGR2 deficiency and was unable to rescue alveolar  
787 macrophage differentiation. Indeed, consistent with a recent study (46), we found EGR1 to be  
788 expressed at low levels by alveolar macrophages, but higher by interstitial macrophages. Thus,  
789 it is plausible that distinct EGR family members may be involved in the differentiation of  
790 anatomically distinct lung macrophages.

791 Notably, if assessed simply on the basis of their unique CD11c<sup>hi</sup>CD11b<sup>lo</sup> profile, the  
792 absolute number of alveolar macrophages was equivalent between adult Cre<sup>-</sup> (*Egr2<sup>fl/fl</sup>*) and  
793 Cre<sup>+</sup> (*Lyz2<sup>Cre</sup>.Egr2<sup>fl/fl</sup>*) mice. This could explain why a recent study by the Nagy lab using an

794 independent strain of *Lyz2<sup>Cre</sup>.Egr2<sup>fl/fl</sup>* mice concluded that EGR2 is not needed for macrophage  
795 differentiation (29). Alternatively, this could reflect that the majority of their studies involved *in*  
796 *vitro* generated macrophages obtained by culturing bone marrow cells with CSF-1 (29). Indeed,  
797 we found that *Egr2* deficient monocytes matured into macrophages equally well when cultured  
798 *in vitro* with CSF-1. However, despite having been reported to drive expression of EGR family  
799 members, including EGR2 (20), in our hands, CSF-1 led to poor upregulation of EGR2 in  
800 maturing macrophages *in vitro*. Instead, we identified CSF-2 (GM-CSF) to be a potent inducer  
801 of EGR2 expression in maturing macrophages *in vitro*, a finding consistent with the almost  
802 unique dependence of alveolar macrophages on alveolar epithelial cell-derived CSF-2, and  
803 not CSF-1, for their development and survival (8-10). However, TG-F $\beta$  also induced EGR2  
804 and we confirmed that TGF- $\beta$  is indispensable for the development of alveolar macrophages  
805 (11). Indeed, TGF- $\beta$  has been shown to induce EGR2 expression outwith the  
806 monocyte/macrophage lineage, such as in mammary epithelial cells (49). Exactly how CSF-2  
807 and TGF- $\beta$  cooperate to promote alveolar macrophage differentiation is incompletely  
808 understood, however they both induce expression of PPAR- $\gamma$  (9, 11) and *Pparg* deficient  
809 alveolar macrophages expressed reduced EGR2 (9), suggesting EGR2 lies downstream of  
810 PPAR- $\gamma$ . Notably, alveolar macrophages from mice with genetic ablation of *Pparg*, *Csf2rb* or  
811 *Tgfbr2* (as shown here) have defects in their ability to establish and self-maintain, a phenotype  
812 not seen in mice with *Egr2* deficiency. Thus, the EGR2-dependent programme appears to  
813 represent a discrete part of alveolar macrophage differentiation, independent of cell survival  
814 in health.

815 EGR2 is consistently referred to as a feature of alternative macrophage activation  
816 induced by IL-4. Indeed, addition of IL-4 to *in vitro* macrophage cultures leads to upregulation  
817 of EGR2 and deletion of STAT6, a downstream adaptor molecule in the IL-4R signalling  
818 cascade, abrogates EGR2 upregulation by IL-4 treated, *in vitro* generated macrophages (33-  
819 35). However, mature alveolar macrophages are considered relatively refractory to IL-4 (50)  
820 and we found no effect of *Il4ra* deficiency on EGR2 expression in health and nor did we detect  
821 upregulation of EGR2 by interstitial macrophages which reside in the IL-4/IL-13-rich lung  
822 parenchyma during bleomycin-induced fibrosis. Thus, the IL-4–IL-4R axis is sufficient, but not  
823 necessary, for inducing EGR2 expression *in vivo*.

824 Unlike mice deficient in *Pparg*, *Csf2rb* or *Tgfbr2*, mice with myeloid or macrophage  
825 deletion of *Egr2* did not develop spontaneous alveolar proteinosis, suggesting EGR2 does not  
826 control the lipid handling and metabolic capacity of alveolar macrophages. However, *Egr2*-  
827 deficient mice displayed functional deficiencies in the ability to control low dose *S. pneumoniae*  
828 infection, suggesting EGR2 controls the immune protective features of alveolar macrophages.  
829 Although we cannot rule out the possibility that this reflects differences in the killing capacity

830 of *Egr2*-deficient alveolar macrophages, genes encoding e.g. reactive oxygen and nitrogen  
831 species were unaffected by *Egr2* deficiency. Instead, genes encoding key pathogen  
832 recognition receptors and opsonins, were significantly downregulated in the absence of EGR2.  
833 These included MARCO and the complement component C3, both of which have been shown  
834 to be crucial for the effective elimination of *S. pneumoniae* (32, 51). Indeed, opsonisation is a  
835 critical factor in optimizing bacterial clearance by alveolar macrophages in health and disease  
836 (52). Thus, EGR2-dependent differentiation equips alveolar macrophages with the machinery  
837 to recognise and eliminate pneumococci and this may explain the recurrent pneumonias in  
838 individuals with mutations in *EGR2* (26). In future work it will be important to determine if this  
839 extends to other respiratory pathogens.

840         Loss of tissue resident macrophages is a common feature of inflammation or tissue  
841 injury. We showed that the resident alveolar macrophage population is diminished markedly  
842 following administration bleomycin, a chemotherapeutic agent routinely used to generate lung  
843 fibrosis. Consistent with previous work (41, 53), we found that the principal mechanism of  
844 macrophage replenishment was through recruitment of BM-derived cells which mature into  
845 bona fide alveolar macrophages with time. Using *Cx3cr1*-based genetic fate mapping, we also  
846 showed that CX3CR1<sup>+</sup>MHCII<sup>+</sup> cells with a hybrid phenotype could be found in the airways  
847 during the fibrotic phase of injury, suggesting that monocyte-derived interstitial macrophages  
848 that accumulate following injury may replenish the alveolar macrophage niche. Although we  
849 cannot rule out that monocytes enter the airways during this phase to give rise to alveolar  
850 macrophages directly, the phenotype of the RFP<sup>+</sup> transitional cells was more aligned with the  
851 phenotype of interstitial macrophages, including high levels of MHCII. Importantly,  
852 repopulation of the alveolar macrophage compartment was dependent on EGR2, with  
853 constitutive deletion of EGR2 severely blunting the engraftment of monocyte-derived cells into  
854 the alveolar macrophage niche. This contrasts with initial population of the developing alveolar  
855 niche by foetal liver-derived monocytes, where *Egr2* deficiency does not affect the  
856 development of alveolar macrophages. This could indicate differential dependence of  
857 developmentally distinct monocytes on EGR2, or the presence of compensatory pathways  
858 during development that are not present during repopulation and further work is required to  
859 fully understand this.

860         Interestingly, although previous work has suggested that monocyte-derived alveolar  
861 macrophages are key pro-fibrotic cells (41, 53), fibrosis appeared to develop normally in *Egr2*  
862 deficient mice, despite the near absence of monocyte-derived alveolar macrophages. The  
863 reason for the discrepancy in our findings and those of Misharin *et al.* (41) is unclear, but it  
864 could reflect differences in the systems used. For instance, the Misharin study exploited the  
865 dependence of alveolar macrophages on Caspase-8 to impede monocyte differentiation into

866 alveolar macrophages by using *Lyz2<sup>Cre</sup>.Casp8<sup>fl/fl</sup>* and *Itgax<sup>Cre</sup>.Casp8<sup>fl/fl</sup>* mice. However, deletion  
867 of Caspase-8 also affects the ability of interstitial macrophages to repopulate following  
868 depletion, meaning that *Casp8* deficiency may have wider effects on lung macrophage  
869 behaviour than disrupting the differentiation of monocyte-derived alveolar macrophages. In  
870 contrast, *EGR2* expression is restricted to alveolar macrophages and deletion does not affect  
871 the reconstitution of the interstitial macrophage compartment. The location of interstitial  
872 macrophages in the parenchyma adjacent to fibroblasts and their production of the fibroblast  
873 mitogen PDGF-aa, suggests that interstitial macrophages are likely to be key to the fibrotic  
874 process (42). Indeed, depletion of interstitial macrophages using *Cx3cr1<sup>Cre-ERT2</sup>.Rosa26<sup>LSL-DTA</sup>*  
875 mice reduces lung fibrosis (42), although as we show here, this will also target *CX3CR1<sup>+</sup>* cells  
876 destined to become monocyte-derived alveolar macrophages. Nevertheless, our data show a  
877 clear role for monocyte-derived macrophages in tissue repair processes, as *Lyz2<sup>Cre</sup>.Egr2<sup>fl/fl</sup>*  
878 mice failed to repair the lung after injury, a finding consistent with an older study using non-  
879 specific, clodronate-mediated depletion of lung macrophages (54) and a recent study  
880 implicating ApoE-producing, monocyte-derived alveolar macrophages in lung fibrosis  
881 resolution (55). These results may help explain the development of restrictive pulmonary  
882 disease in individuals with mutations in *EGR2* (26).

883 In summary, our results demonstrate that *EGR2* is an evolutionarily conserved  
884 transcriptional regulator of alveolar macrophage differentiation, loss of which leads to major  
885 phenotypic, transcriptional and functional deficiencies. By identifying *EGR2* as a  
886 transcriptional regulator, we have begun to dissect how common factors such as *CSF2* and  
887 *TGFβ* confer specificity during macrophage differentiation. Importantly, given that recent  
888 studies using human systems have proposed that alveolar macrophage maintenance in  
889 humans requires monocyte input (56, 57), *EGR2* may play a particularly important role in  
890 alveolar macrophage differentiation in man. Thus, further work is required to fully understand  
891 the molecular pathways downstream of *EGR2* and whether this is conserved between mouse  
892 and humans, and if *EGR2* plays distinct roles in different pathological settings.

893

894

895 **Materials and Methods**

896 **Experimental Animals**

897 Mice were bred and maintained in specific pathogen free (SPF) facilities at the University of  
 898 Edinburgh or University of Glasgow, UK. All experimental mice were age matched and both  
 899 sexes were used throughout the study. The mice used in each experiment is documented in  
 900 the appropriate figure legend. Experiments performed at UK establishments were permitted  
 901 under licence by the UK Home Office and were approved by the University of Edinburgh  
 902 Animal Welfare and Ethical Review Body. Genotyping was performed by Transnetyx using  
 903 real-time PCR.  
 904

| Strain                                                                                              | Source                                                            | Identifier                                                                     |
|-----------------------------------------------------------------------------------------------------|-------------------------------------------------------------------|--------------------------------------------------------------------------------|
| C57BL/6J CD45.1                                                                                     | University of Edinburgh                                           |                                                                                |
| C57BL/6J CD45.2 <sup>+</sup>                                                                        | University of Edinburgh                                           |                                                                                |
| C57BL/6J CD45.1/2 <sup>+</sup>                                                                      | University of Edinburgh                                           |                                                                                |
| <i>Rag1</i> <sup>-/-</sup>                                                                          | University of Glasgow, UK                                         |                                                                                |
| <i>Il4ra</i> <sup>-/-</sup>                                                                         | Prof. Rick Maizels, University of Glasgow, UK                     |                                                                                |
| <i>Lyz2</i> <sup>Cre</sup> . <i>Egr2</i> <sup>fl/fl</sup>                                           | Generated for this study.                                         | <i>Lyz2</i> <sup>Cre</sup> mice (23)<br><i>Egr2</i> <sup>fl/fl</sup> mice (24) |
| <i>Fcgr1</i> <sup>Cre</sup> ( <i>B6-Fcgr1</i> <sup>tm2-Ciphe</sup> )                                | Prof. Bernard Malissen, Dr Sandrine Henri, CIML and CIPHE, France | (3)                                                                            |
| <i>Fcgr1</i> <sup>Cre</sup> . <i>Egr2</i> <sup>fl/fl</sup>                                          | Generated for this study.                                         |                                                                                |
| <i>Cx3cr1</i> <sup>tm2.1(cre/ERT2)Jung</sup>                                                        | Jackson Laboratories (JAX)                                        | Stock ID: 020940                                                               |
| <i>Rosa26</i> <sup>LSL-tdRFP</sup> ( <i>Gt(Rosa)26Sor</i> <sup>tm1Hjf</sup> )                       | Elaine Dzierzak, University of Edinburgh                          | (58)                                                                           |
| <i>Cx3cr1</i> <sup>Cre-ERT2</sup> . <i>Egr2</i> <sup>fl/fl</sup> . <i>Rosa26</i> <sup>LSL-RFP</sup> | Generated for this study.                                         |                                                                                |
| <i>Tgfb2</i> <sup>fl/fl</sup>                                                                       | Jackson Laboratories (JAX)                                        | Stock ID: 012603                                                               |
| <i>Fcgr1</i> <sup>Cre</sup> . <i>Tgfb2</i> <sup>fl/fl</sup>                                         | Generated for this study.                                         |                                                                                |

905

906 **Human cells.** BAL fluid was obtained from patients attending the Edinburgh Lung Fibrosis  
 907 Clinic. Ethical permission was granted from the NHS Lothian Research ethics board (LREC  
 908 07/S1102/20 06/S0703/53). BAL fluid cells were stained for flow cytometric analysis with  
 909 antibodies listed in Supplementary Table 4.

910 **Tamoxifen-based fate mapping.** For induction of Cre activity in *Cx3cr1*<sup>Cre-ERT2/+</sup> mice,  
 911 tamoxifen was dissolved in sesame oil overnight at 50mg/ml in a glass vial and administered  
 912 by oral gavage at 5mg per day for five consecutive days. In bleomycin experiments, tamoxifen  
 913 was administered from d16 post bleomycin administration for 5 days. Fresh tamoxifen was  
 914 prepared for each experiment.  
 915

916 **Bleomycin lung injury.** Bleomycin sulphate (Cayman chemicals) was prepared by first  
 917 dissolving in sterile DMSO (Sigma) and further in sterile PBS at 0.66µg/ml. 8-12-week-old  
 918 *Lyz2*<sup>Cre</sup>.*Egr2*<sup>fl/fl</sup> and *Egr2*<sup>fl/fl</sup> littermate controls were anaesthetised with isoflurane and  
 919 administered 50µl bleomycin (33ng) or vehicle control (DMSO/PBS) by oropharyngeal  
 920 aspiration.



921 ***Streptococcus pneumoniae* infection.** *Lyz2<sup>Cre/+</sup>.Egr2<sup>fl/fl</sup>* mice and *Egr2<sup>fl/fl</sup>* littermate control  
922 male mice (8–14-week-old) were anaesthetised ketamine/medetomidine and inoculated  
923 intratracheally with 50µl of PBS containing 10<sup>4</sup> CFU *S. pneumoniae* (capsular type 2 strain  
924 D39). 100µl of inoculum was plated on blood agar to determine exact dose. Mice were culled  
925 14 h later and BAL fluid collected by lavage performed using sterile PBS. 100µl of lavage fluid  
926 was cultured for bacterial growth for 24 h. The remaining lavage fluid was centrifuged at 400g  
927 for 5 mins and the resulting cells counted and prepared for flow cytometric analysis.

928 ***BM chimeric mice.*** To generate WT:*Lyz2<sup>Cre</sup>.Egr2<sup>fl/fl</sup>* mixed chimeras, CD45.1<sup>+</sup>CD45.2<sup>+</sup> WT  
929 mice were lethally irradiated with two doses of 5 Gy 1 hour apart before being reconstituted  
930 immediately WT (CD45.1<sup>+</sup>) and *Lyz2<sup>Cre/+</sup>.Egr2<sup>fl/fl</sup>* or *Egr2<sup>fl/fl</sup>* (CD45.2<sup>+</sup>) bone marrow at a ratio  
931 of 1:1. Chimerism was assessed at 8 weeks after reconstitution.

932  
933 ***Processing of tissues.*** Mice were sacrificed by overdose with sodium pentobarbitone  
934 followed by exsanguination. Mice were then gently perfused with PBS through the heart. In  
935 lung injury/fibrosis experiments, the right lobe was tied off, excised and stored in RPMI with  
936 10% FCS on ice before being prepared for enzymatic digestion (see below). The left lung lobe  
937 was inflated with 600µl 4% PFA through an intra-tracheal canula. The trachea was tied off with  
938 thread and the lung and heart carefully excised and stored in 4% PFA overnight. Fixed lung  
939 tissue was moved to 70% ethanol before being processed for histological assessment. Right  
940 lung lobes were chopped finely and digested in pre-warmed RPMI1640 with 'collagenase  
941 cocktail' (0.625mg ml<sup>-1</sup> collagenase D (Roche), 0.425mg ml<sup>-1</sup> collagenase V (Sigma-Aldrich),  
942 1mg ml<sup>-1</sup> Dispase (ThermoFisher), and 30 U ml<sup>-1</sup> DNase (Roche Diagnostics GmbH)) for 25  
943 minutes in a shaking incubator at 37°C before being passed through a 100µm strainer followed  
944 by centrifugation at 300g for 5 mins. Cell suspensions were then incubated in 2mls Red Blood  
945 Cell Lysing Buffer Hybri-Max (Sigma-Aldrich) for 2mins at room temperature to lyse  
946 erythrocytes. Cell suspensions were then washed in FACS buffer (2% FCS/2mM EDTA/PBS)  
947 followed by centrifugation at 300g for 5 mins. Cells were resuspended in 5mls of FACS buffer,  
948 counted and kept on ice until staining for flow cytometry. In some experiments BAL fluid was  
949 obtained by lavaging the lungs with 0.8ml DPBS/2mM EDTA via an intra-tracheal catheter.  
950 This was repeated three times, with the first wash kept separate for analysis of BAL cytokines,  
951 turbidity and protein concentration. To obtain splenic leukocytes, spleens were chopped and  
952 digested in HBSS with 1mg/ml collagenase D for 45 mins in a shaking incubator at 37°C before  
953 being passed through a 100µm strainer followed by centrifugation at 400g for 5 mins. Tissue  
954 preparations were washed in FACS buffer (2% FCS/2mM EDTA/PBS) followed by  
955 centrifugation at 300g for 5 mins. Erythrocytes were lysed using red blood cell lysis buffer  
956 (Sigma-Aldrich). To obtain liver leukocytes, livers were perfused through the inferior vena cava  
957 with sterile PBS and liver tissue excised. Livers were then chopped finely and digested in pre-  
958 warmed collagenase 'cocktail' (5ml/liver) for 30 minutes in a shaking incubator at 37°C before  
959 being passed through a 100µm filter. Cells were washed twice in 50ml ice cold RPMI followed  
960 by centrifugation at 300g for 5 mins (59). Supernatants were discarded and erythrocytes were  
961 lysed. Epidermal and dermal leukocytes were isolated as described previously (61). To obtain  
962 peritoneal leukocytes, the peritoneal cavity was lavaged with RPMI containing 2mM EDTA  
963 and 10mM HEPES (both ThermoFisher) as described previously (62). Cells were  
964 resuspended in FACS buffer, counted and kept on ice until staining for flow cytometry.  
965

966 **Flow cytometry.** For analysis of unfixed cells, an equal number of cells were first incubated  
967 with 0.025 µg anti-CD16/32 (2.4G2; Biolegend) for 10mins on ice to block Fc receptors and  
968 then stained with a combination of the antibodies detailed in Supplementary Table 4. Where  
969 appropriate, cells were subsequently stained with streptavidin-conjugated BV650 (Biolegend).  
970 Dead cells were excluded using DAPI or 7-AAD (Biolegend) added 2mins before acquisition.  
971 When assessing intracellular markers, cells were first washed in PBS and then incubated with  
972 Zombie NIR fixable viability dye (Biolegend) for 10mins at room temperature protected from  
973 light before following the approach detailed above. Following the final wash step, cells were  
974 subsequently fixed and permeabilized using FoxP3/Transcription Factor Staining Buffer Set  
975 (eBioscience), and intracellular staining performed using antibodies detailed in Supplementary  
976 Table 4. Fluorescence-minus-one (FMO) controls confirmed gating strategies, while discrete  
977 populations within lineage<sup>+</sup> cells were confirmed by omission of the corresponding population-  
978 specific antibody. Samples were acquired using a FACS LSRFortessa or ARIALL using  
979 FACSDiva software (BD) and analyzed with FlowJo software (version 9 or 10; Tree Star).  
980 Analysis was performed on single live cells determined using forward scatter height (FCS-H)  
981 versus area (FSC-A) and negativity for viability dyes. mRNA was detected by flow cytometry  
982 using PrimeFlow technology (ThermoFisher) using probes against Spp1 (AF647) according  
983 to the manufacturer's guidelines. For staining controls in PrimeFlow analysis, the Target Probe  
984 Hybridization step was omitted with all other steps identical to samples.

985

#### 986 **Transcriptional Analysis.**

987 **qPCR:** Real-time PCR assays for the detection of mRNAs were performed using Light Cycler  
988 System (Roche) and 384-Well Reaction Plates (Roche). Primer sequences are as follows:

989

|              | Forward                      | Reverse                     |
|--------------|------------------------------|-----------------------------|
| <i>Ppia</i>  | 5'-ACGCCACTGTCGCTTTTC-3      | 5'-CTGCAAACAGCTCGAAGGA-3'   |
| <i>Car4</i>  | 5'-CAAACCAAGGATCCTAGAAGCA-3' | 5'-GGGGACTGCTGATTCTCCTT-3'  |
| <i>Fabp1</i> | 5'-CCATGACTGGGGAAAAAGTC-3'   | 5'-GCCTTTGAAAGTTGTCACCAT-3' |

|               | Qiagen QuantiTect Primers                             |
|---------------|-------------------------------------------------------|
| <i>Col3a1</i> | Mm_Col3a1_1_SG; Cat No. QT01055516; Lot No. 287520017 |
| <i>Pdgfrb</i> | Mm_Pdgfrb_1_SG; Cat No. QT00113148; Lot No. 224645185 |

990

991 Reactions were performed using SYBR Green System (LightCycler<sup>®</sup> 480 SYBR Green I  
992 Master) according to the manufacturer protocol. 1ul of cDNA (1:50 dilution) were used per  
993 sample in a total reaction volume of 10uL. The temperature profile used was as follows: pre-  
994 denaturation 5 min at 95°C and then 45 cycles of denaturation for 10s at 95°C, annealing 10s  
995 at 60°C, elongation 10s at 72°C. Fluorescence data collection was performed at the end of  
996 each elongation step. All samples were tested in duplicates and nuclease free water was used  
997 as a non-template control. The relative change was calculated using the  $2^{-\Delta\Delta Ct}$  method (63),  
998 normalized to *Ppia*.

999

1000 **Bulk sequencing:** Alveolar macrophages were FACS-purified from lung digests from  
1001 unmanipulated female *Lyz2<sup>Cre</sup>.Egr2<sup>fl/fl</sup>* mice or *Egr2<sup>fl/fl</sup>* controls. For each population, 25,000  
1002 cells were sorted into 500µl RLT buffer (Qiagen) and snap frozen on dry ice. RNA was isolated  
1003 using the RNeasy Plus Micro kit (Qiagen). RNA samples were quantified using Qubit 2.0  
1004 Fluorometer (Life Technologies, Carlsbad, CA, USA) and RNA integrity was checked with  
1005 2100 TapeStation (Agilent Technologies, Palo Alto, CA, USA). SMART-Seq v4 Ultra Low Input  
1006 Kit for Sequencing was used for full-length cDNA synthesis and amplification (Clontech,

1007 Mountain View, CA), and Illumina Nextera XT library was used for sequencing library  
1008 preparation. Briefly, cDNA was fragmented and adaptor was added using Transposase,  
1009 followed by limited-cycle PCR to enrich and add index to the cDNA fragments. The final library  
1010 was assessed with Qubit 2.0 Fluorometer and Agilent TapeStation. The sequencing libraries  
1011 were multiplexed and clustered on two lanes of a flowcell. After clustering, the flowcell were  
1012 loaded on the Illumina HiSeq instrument according to manufacturer's instructions. The  
1013 samples were sequenced using a 2x150 Paired End (PE) configuration. Image analysis and  
1014 base calling were conducted by the HiSeq Control Software (HCS) on the HiSeq instrument.  
1015 Raw sequence data (.bcl files) generated from Illumina HiSeq were be converted into fastq  
1016 files and de-multiplexed using Illumina bcl2fastq v. 2.17 program. One mis-match was allowed  
1017 for index sequence identification. After demultiplexing, sequence data was checked for overall  
1018 quality and yield. Then, sequence reads were trimmed to remove possible adapter sequences  
1019 and nucleotides with poor quality using Trimmomatic v.0.36. The trimmed reads were mapped  
1020 to the *Mus musculus* mm10 reference genome available on ENSEMBL using the STAR  
1021 aligner v.2.5.2b. The STAR aligner uses a splice aligner that detects splice junctions and  
1022 incorporates them to help align the entire read sequences. BAM files were generated as a  
1023 result of this step. Unique gene hit counts were calculated by using featureCounts from the  
1024 Subread package v.1.5.2. Only unique reads that fell within exon regions were counted. After  
1025 extraction of gene hit counts, the gene hit counts table was used for downstream differential  
1026 expression analysis. Using DESeq2, a comparison of gene expression between the groups of  
1027 samples was performed. The Wald test was used to generate p-values and Log2 fold changes.  
1028 Genes with adjusted p-values < 0.05 and absolute log2 fold changes > 1 were called as  
1029 differentially expressed genes for each comparison.  
1030

1031 **scRNA-seq:** CD11c<sup>+</sup> and CD11b<sup>+</sup> cells, excluding Ly6G<sup>+</sup> and SiglecF<sup>+</sup>CD11b<sup>+</sup> eosinophils,  
1032 were FACS-purified from unmanipulated an adult *Rag1*<sup>-/-</sup> mouse. Single cells were processed  
1033 through the Chromium Single Cell Platform using the Chromium Single Cell 3' Library and Gel  
1034 Bead Kit V2 and the Chromium Single Cell A Chip Kit (both 10X Genomics) as per the  
1035 manufacturer's protocol (64). Briefly, single myeloid cells were purified by FACS into PBS/2%  
1036 FBS, washed twice and cell number measured using a Bio-Rad TC20 Automated Cell Counter  
1037 (BioRad). Approximately 10,000 cells were loaded to each lane of a 10X chip and partitioned  
1038 into Gel Beads in Emulsion containing distinct barcodes in the Chromium instrument, where  
1039 cell lysis and barcoded reverse transcription of RNA occurred, followed by amplification,  
1040 fragmentation and 5' adaptor and sample index attachment. Libraries were sequenced on an  
1041 Illumina HiSeq 4000. For analysis, Illumina BCL sequencing files were demultiplexed using  
1042 10x Cell Ranger (version 2.1.1; <https://www.10xgenomics.com>; 'cellranger\_mkfastq').  
1043 Resultant FASTQ files were fed into 'cellranger\_count' with the transcriptome 'refdata-  
1044 cellranger-mm10-1.2.0' to perform genome alignment, filtering, barcode counting and UMI  
1045 counting. Downstream QC, clustering and gene expression analysis was performed using the  
1046 Seurat R package (V3; R version 4.0.2) following the standard pre-processing workflow (65).  
1047 Cells were filtered on QC covariates used to identify nonviable cells or doublets: number of  
1048 unique genes per cell (nFeatureRNA >200 & <4000); percentage mitochondrial genes (<20%).  
1049 Data for resultant 3936 cells were normalized and scaled prior to PCA analysis. Unsupervised  
1050 clustering based on the first 20 principal components of the most variably expressed genes  
1051 was performed using a KNN graph-based approach and resultant clusters visualised using  
1052 the Uniform Manifold Approximation and Projection (UMAP) method. Differential gene  
1053 expression analysis was used to identify genes expressed by each cell cluster relative to all



1054 others, using the nonparametric Wilcoxon rank-sum test and p-value threshold of <0.05.  
1055 Canonical cell phenotypes were assigned to individual clusters based on the expression of  
1056 known landmark gene expression profiles.

1057 Publicly available datasets were downloaded from the COVID-19 Cell Atlas (13-15) to perform  
1058 in silico analysis of EGR2 expression in human tissue macrophages. Data were pre-processed  
1059 and merged using the Seurat R package (V3; R version 4.0.2) following standard methods.  
1060 Macrophages were extracted based on the expression of C1QA > 0 to compare expression of  
1061 EGR2 in different human tissue settings.

1062  
1063 **BAL fluid analysis.** The first BAL wash was centrifuged at 400g for 5mins and supernatant  
1064 removed and stored at -80°C until analysis. Total protein concentrations in BAL fluid were  
1065 measured by BCA Protein Assay according to the manufacturer's instructions (ThermoFisher).  
1066 Turbidity was determined following gentle mixing by diluting 25ul of sample with 75ul DPBS  
1067 and measuring the optical density of 600nm and multiplying by the dilution factor. BAL  
1068 cytokines were measured using 50ul undiluted sample and the Cytokine & Chemokine 26-  
1069 Plex ProcartaPlex (Panel 1) assay according to manufacturer's guidelines (ThermoFisher).

1070  
1071 **Lung histology.** Formalin-inflated lungs were fixed overnight in 4% buffered formalin and  
1072 stored in 70% ethanol. Paraffin-embedded sections of mouse lungs were stained with  
1073 Masson's trichome as per the manufacturer's guidelines.

1074  
1075 **Immunofluorescence imaging.** Imagin was performed as described recently (Fercoq et al.,  
1076 2020). Briefly, samples were permeabilized and blocked for 20min in PBS/Neutral goat serum  
1077 (NGS) 10%/BSA1%/TritonX-100 (Tx100) 0.3%/Azide 0.05% at 37 °C and stained with 150 µl  
1078 rabbit anti-CD68 Ab (Polyclonal, ab125212, abcam, 1/200) diluted in PBS/ NGS10%/BSA1%/  
1079 TX-100 0.3%/Azide 0.05% for 20min. Samples were washed 3 times with PBS/BSA1%/TX-  
1080 100 0.1%/Azide 0.05% before adding 150 µl of a solution containing DAPI (1/10000), aSMA-  
1081 Cy3 (clone 1A4, Sigma, 1/1000), anti-rabbit-AF488 (polyclonal, A-21206 ThermoFisher)  
1082 diluted in PBS/ NGS10%/BSA1%/ TX-100 0.3%/Azide 0.05% for 1h. Samples were washed  
1083 3 times with PBS/BSA1%/TX-100 0.1%/Azide 0.05% and 2 times in PBS. Finally slides were  
1084 mounted with Vectashield (Vector Laboratories, H-1700). Images were acquired with a Zeiss  
1085 LSM 880 NLO multiphoton microscope (Carl Zeiss, Oberkochen, Germany) equipped with a  
1086 32 channel Gallium arsenide phosphide (GaAsP) spectral detector using 20×/1 NA water  
1087 immersion objective lens. Samples were excited with a tunable laser (680–1300 nm) set up at  
1088 1000 nm and signal was collected onto a linear array of the 32 GaAsP detectors in lambda  
1089 mode with a resolution of 8.9 nm over the visible spectrum. Spectral images were then  
1090 unmixed with Zen software (Carl Zeiss) using references spectra acquired from unstained  
1091 tissues (tissue autofluorescence and second harmonic generation) or beads labelled with Cy3-  
1092 or AF488-conjugated antibodies.

1093  
1094 **Image analysis.** Fluorescence images were analysed with QuPath (66). Full lung section was  
1095 annotated using the "simple tissue detection" tool and non-pulmonary tissue (trachea, heart  
1096 tissue) were manually removed from the annotation. In order to refine the analysis, "Pixel  
1097 classification" was used to segment lung regions of interest. Briefly, software was trained to  
1098 recognize the different regions using fluorescence ( $\alpha$ SMA, SHG and autofluorescence) and  
1099 texture (all available) features from example images. 2-3 example areas per regions of interest  
1100 were annotated for each lung to train the pixel classifier. The following regions were analysed:

1101 (1) normal lung parenchyma/alveolar tissue, (2) pathologic/fibrotic tissue and (3) collagen rich  
1102 areas: perivascular/(peri)bronchial spaces + pleura were segmented to avoid false fibrotic  
1103 region detection. Macrophages were detected using the “Positive cell detection” tool and were  
1104 expressed as the number DAPI<sup>+</sup> CD68<sup>+</sup> cells/mm<sup>2</sup> of analysed region (full section or regions  
1105 of interest). Fibrosis was defined as percentage of full section with fibrotic features. All fibrosis  
1106 scoring and macrophage quantification was performed in a blinded fashion.

1107

1108 **Statistics.** Statistics were performed using Prism 7 (GraphPad Software). The statistical test  
1109 used in each experiment is detailed in the relevant figure legend.

1110

1111 **Accession codes.** RNA sequencing data that support the findings of this study will be  
1112 deposited in National Center for Biotechnology Information Gene Expression Omnibus public  
1113 database (<http://www.ncbi.nlm.nih.gov/geo/>) upon acceptance.

1114

1115 **Data availability.** Data that support the findings of this study are available from the  
1116 corresponding authors upon reasonable request.

1117

1118 Further information and requests for resources and reagents should be directed to and will  
1119 be fulfilled by the Lead Contact, Calum Bain ([calum.bain@ed.ac.uk](mailto:calum.bain@ed.ac.uk)).

1120

## 1121 References

1122

- 1123 1. E. L. Gautier, T. Shay, J. Miller, M. Greter, C. Jakubzick, S. Ivanov, J. Helft, A. Chow, K.  
1124 G. Elpek, S. Gordonov, A. R. Mazloom, A. Ma'ayan, W. J. Chua, T. H. Hansen, S. J.  
1125 Turley, M. Merad, G. J. Randolph, Gene-expression profiles and transcriptional  
1126 regulatory pathways that underlie the identity and diversity of mouse tissue  
1127 macrophages, *Nature immunology* **13**, 1118–1128 (2012).
- 1128 2. Y. Lavin, D. Winter, R. Blecher-Gonen, E. David, H. Keren-Shaul, M. Merad, S. Jung, I.  
1129 Amit, Tissue-resident macrophage enhancer landscapes are shaped by the local  
1130 microenvironment, *Cell* **159**, 1312–1326 (2014).
- 1131 3. C. L. Scott, W. T'Jonck, L. Martens, H. Todorov, D. Sichien, B. Soen, J. Bonnardel, S.  
1132 De Prijck, N. Vandamme, R. Cannoodt, W. Saelens, B. Vanneste, W. Toussaint, P. De  
1133 Bleser, N. Takahashi, P. Vandenabeele, S. Henri, C. Pridans, D. A. Hume, B. N.  
1134 Lambrecht, P. De Baetselier, S. W. F. Milling, J. A. Van Ginderachter, B. Malissen, G.  
1135 Berx, A. Beschin, Y. Saeys, M. Guilliams, The Transcription Factor ZEB2 Is Required to  
1136 Maintain the Tissue-Specific Identities of Macrophages, *Immunity* **49**, 312–325.e5  
1137 (2018).
- 1138 4. P. P. Ogger, A. J. Byrne, Macrophage metabolic reprogramming during chronic lung  
1139 disease, *Mucosal Immunol* **14**, 282–295 (2021).
- 1140 5. M. Merad, J. C. Martin, Pathological inflammation in patients with COVID-19: a key role  
1141 for monocytes and macrophages, *Nature reviews* **20**, 355–362 (2020).
- 1142 6. E. Mass, I. Ballesteros, M. Farlik, F. Halbritter, P. Günther, L. Crozet, C. E. Jacome-  
1143 Galarza, K. Händler, J. Klughammer, Y. Kobayashi, E. Gomez Perdiguero, J. L.  
1144 Schultze, M. Beyer, C. Bock, F. Geissmann, Specification of tissue-resident  
1145 macrophages during organogenesis, *Science (New York, N.Y)* **353** (2016),  
1146 doi:10.1126/science.aaf4238.
- 1147 7. E. Gomez Perdiguero, K. Klapproth, C. Schulz, K. Busch, E. Azzoni, L. Crozet, H.  
1148 Garner, C. Trouillet, M. F. de Bruijn, F. Geissmann, H.-R. Rodewald, Tissue-resident  
1149 macrophages originate from yolk-sac-derived erythro-myeloid progenitors, *Nature* **518**,  
1150 547–551 (2015).

- 1151 8. M. Williams, I. De Kleer, S. Henri, S. Post, L. Vanhoutte, S. De Prijck, K. Deswarte, B.  
1152 Malissen, H. Hammad, B. N. Lambrecht, Alveolar macrophages develop from fetal  
1153 monocytes that differentiate into long-lived cells in the first week of life via GM-CSF, *The*  
1154 *Journal of experimental medicine* **210**, 1977–1992 (2013).
- 1155 9. C. Schneider, S. P. Nobs, M. Kurrer, H. Rehrauer, C. Thiele, M. Kopf, Induction of the  
1156 nuclear receptor PPAR- $\gamma$  by the cytokine GM-CSF is critical for the differentiation of fetal  
1157 monocytes into alveolar macrophages, *Nature immunology* **15**, 1026–1037 (2014).
- 1158 10. Gschwend, J., Sherman, S., Ridder, F., Feng, X., Liang, H-E., Locksley, R., M., Becher,  
1159 B., Schneider, C., 2021. Alveolar macrophages strictly rely on GM-CSF from alveolar  
1160 epithelial type 2 cells before and after birth. 2021. bioRxiv doi:  
1161 <https://doi.org/10.1101/2021.04.01.438051>
- 1162 11. X. Yu, A. Buttgereit, I. Lelios, S. G. Utz, D. Cansever, B. Becher, M. Greter, The  
1163 Cytokine TGF- $\beta$  Promotes the Development and Homeostasis of Alveolar Macrophages,  
1164 *Immunity* **47**, 903–912.e4 (2017).
- 1165 12. E. L. Gautier, A. Chow, R. Spanbroek, G. Marcelin, M. Greter, C. Jakubzick, M.  
1166 Bogunovic, M. Leboeuf, N. Van Rooijen, A. J. Habenicht, M. Merad, G. J. Randolph,  
1167 Systemic analysis of PPAR $\gamma$  in mouse macrophage populations reveals marked  
1168 diversity in expression with critical roles in resolution of inflammation and airway  
1169 immunity, *J. Immunol.* **189**, 2614–2624 (2012).
- 1170 13. K. Okreglicka, I. Iten, L. Pohlmeier, L. Onder, Q. Feng, M. Kurrer, B. Ludewig, P.  
1171 Nielsen, C. Schneider, M. Kopf, PPAR $\gamma$  is essential for the development of bone marrow  
1172 erythroblastic island macrophages and splenic red pulp macrophages, *The Journal of*  
1173 *experimental medicine* **218** (2021), doi:10.1084/jem.20191314.
- 1174 14. D. W. Cain, E. G. O'Koren, M. J. Kan, M. Womble, G. D. Sempowski, K. Hopper, M. D.  
1175 Gunn, G. Kelsoe, Identification of a tissue-specific, C/EBP $\beta$ -dependent pathway of  
1176 differentiation for murine peritoneal macrophages, *J. Immunol.* **191**, 4665–4675 (2013).
- 1177 15. Rauschmeier, R., Gustafsson, C., Reinhardt, A., A-Gonzalez, N., Tortola, L., Cansever,  
1178 D., Subramanian, S., Taneja, R., Rossner, M. J., Sieweke, M. H., Greter, M., Månsson,  
1179 R., Busslinger, M., & Kreslavsky, T. Bhlhe40 and Bhlhe41 transcription factors regulate  
1180 alveolar macrophage self-renewal and identity. *The EMBO journal*, 38(19),  
1181 e101233. (2019).
- 1182 16. E. Madisson, A. Wilbrey-Clark, R. J. Miragaia, K. Saeb-Parsy, K. T. Mahbubani, N.  
1183 Georgakopoulos, P. Harding, K. Polanski, N. Huang, K. Nowicki-Osuch, R. C. Fitzgerald,  
1184 K. W. Loudon, J. R. Ferdinand, M. R. Clatworthy, A. Tsingene, S. van Dongen, M.  
1185 Dabrowska, M. Patel, M. J. T. Stubbington, S. A. Teichmann, O. Stegle, K. B. Meyer,  
1186 scRNA-seq assessment of the human lung, spleen, and esophagus tissue stability after  
1187 cold preservation, *Genome Biol.* **21**, 1 (2019).
- 1188 17. S. A. MacParland, J. C. Liu, X.-Z. Ma, B. T. Innes, A. M. Bartczak, B. K. Gage, J.  
1189 Manuel, N. Khuu, J. Echeverri, I. Linares, R. Gupta, M. L. Cheng, L. Y. Liu, D. Camat, S.  
1190 W. Chung, R. K. Seliga, Z. Shao, E. Lee, S. Ogawa, M. Ogawa, M. D. Wilson, J. E. Fish,  
1191 M. Selzner, A. Ghanekar, D. Grant, P. Greig, G. Sapisochin, N. Selzner, N. Winegarten,  
1192 O. Adeyi, G. Keller, G. D. Bader, I. D. McGilvray, Single cell RNA sequencing of human  
1193 liver reveals distinct intrahepatic macrophage populations, *Nat Commun* **9**, 4383 (2018).
- 1194 18. N. Habib, I. Avraham-Davidi, A. Basu, T. Burks, K. Shekhar, M. Hofree, S. R.  
1195 Choudhury, F. Aguet, E. Gelfand, K. Ardlie, D. A. Weitz, O. Rozenblatt-Rosen, F. Zhang,  
1196 A. Regev, Massively parallel single-nucleus RNA-seq with DroNc-seq, *Nat Methods* **14**,  
1197 955–958 (2017).
- 1198 19. P. Laslo, C. J. Spooner, A. Warmflash, D. W. Lancki, H.-J. Lee, R. Sciammas, B. N.  
1199 Gantner, A. R. Dinner, H. Singh, Multilineage transcriptional priming and determination of  
1200 alternate hematopoietic cell fates, *Cell* **126**, 755–766 (2006).
- 1201 20. J. H. Carter, W. G. Tourtellotte, Early growth response transcriptional regulators are  
1202 dispensable for macrophage differentiation, *J. Immunol.* **178**, 3038–3047 (2007).
- 1203 21. P. J. Swiatek, T. Gridley, Perinatal lethality and defects in hindbrain development in mice  
1204 homozygous for a targeted mutation of the zinc finger gene Krox20, *Genes Dev* **7**, 2071–  
1205 2084 (1993).

- 1206 22. P. Topilko, G. Levi, G. Merlo, S. Mantero, C. Desmarquet, G. Mancardi, P. Charnay,  
1207 Differential regulation of the zinc finger genes Krox-20 and Krox-24 (Egr-1) suggests  
1208 antagonistic roles in Schwann cells, *J Neurosci Res* **50**, 702–712 (1997).
- 1209 23. Clausen, B. E., Burkhardt, C., Reith, W., Renkawitz, R., Forster, I., 1999. Conditional  
1210 gene targeting in macrophages and granulocytes using LysMcre mice. *Transgenic Res.*  
1211 **8**(4) 265–277. <http://doi.org/10.1023/a:1008942828960>
- 1212 24. Taillebourg, E., Buart, S., Charnay, P., 2002. Conditional, floxed allele of the Krox20  
1213 gene. *32*(2), 112–113. <http://doi.org/10.1002/gene.10062>
- 1214 25. S. Neupane, M. Willson, A. K. Chojnacki, F. Vargas E Silva Castanheira, C. Morehouse,  
1215 A. Carestia, A. E. Keller, M. Peiseler, A. DiGiandomenico, M. M. Kelly, M. Amrein, C.  
1216 Jenne, A. Thanabalasuriar, P. Kubes, Patrolling Alveolar Macrophages Conceal Bacteria  
1217 from the Immune System to Maintain Homeostasis, *Cell* **183**, 110–125.e11 (2020).
- 1218 26. K. Szigeti, W. Wiszniewski, G. M. Saifi, D. L. Sherman, N. Sule, A. M. Adesina, P.  
1219 Mancias, S. C. Papasozomenos, G. Miller, L. Keppen, D. Daentl, P. J. Brophy, J. R.  
1220 Lupski, Functional, histopathologic and natural history study of neuropathy associated  
1221 with EGR2 mutations, *Neurogenetics* **8**, 257–262 (2007).
- 1222 27. C. Happle, N. Lachmann, J. Škuljec, M. Wetzke, M. Ackermann, S. Brenig, A. Mucci, A.  
1223 C. Jirno, S. Groos, A. Mirenska, C. Hennig, T. Rodt, J. P. Bankstahl, N. Schwerk, T.  
1224 Moritz, G. Hansen, Pulmonary transplantation of macrophage progenitors as effective  
1225 and long-lasting therapy for hereditary pulmonary alveolar proteinosis, *Sci Transl Med* **6**,  
1226 250ra113 (2014).
- 1227 28. T. Suzuki, T. Sakagami, B. K. Rubin, L. M. Noguee, R. E. Wood, S. L. Zimmerman, T.  
1228 Smolarek, M. K. Dishop, S. E. Wert, J. A. Whitsett, G. Grabowski, B. C. Carey, C.  
1229 Stevens, J. C. M. van der Loo, B. C. Trapnell, Familial pulmonary alveolar proteinosis  
1230 caused by mutations in CSF2RA, *The Journal of experimental medicine* **205**, 2703–2710  
1231 (2008).
- 1232 29. T. Suzuki, P. Arumugam, T. Sakagami, N. Lachmann, C. Chalk, A. Sallese, S. Abe, C.  
1233 Trapnell, B. Carey, T. Moritz, P. Malik, C. Lutzko, R. E. Wood, B. C. Trapnell, Pulmonary  
1234 macrophage transplantation therapy, *Nature* **514**, 450–454 (2014).
- 1235 30. J. A. Preston, M. A. Bewley, H. M. Marriott, A. McGarry Houghton, M. Mohasin, J.  
1236 Jubrail, L. Morris, Y. L. Stephenson, S. Cross, D. R. Greaves, R. W. Craig, N. van  
1237 Rooijen, C. D. Bingle, R. C. Read, T. J. Mitchell, M. K. B. Whyte, S. D. Shapiro, D. H.  
1238 Dockrell, Alveolar Macrophage Apoptosis-associated Bacterial Killing Helps Prevent  
1239 Murine Pneumonia, *Am. J. Respir. Crit. Care Med.* **200**, 84–97 (2019).
- 1240 31. H. M. Marriott, M. Daigneault, A. A. R. Thompson, S. R. Walmsley, S. K. Gill, D. R.  
1241 Witcher, V. J. Wroblewski, P. G. Hellewell, M. K. B. Whyte, D. H. Dockrell, A decoy  
1242 receptor 3 analogue reduces localised defects in phagocyte function in pneumococcal  
1243 pneumonia, *Thorax* **67**, 985–992 (2012).
- 1244 32. M. Arredouani, Z. Yang, Y. Ning, G. Qin, R. Soininen, K. Tryggvason, L. Kobzik, The  
1245 scavenger receptor MARCO is required for lung defense against pneumococcal  
1246 pneumonia and inhaled particles, *The Journal of experimental medicine* **200**, 267–272  
1247 (2004).
- 1248 33. T. Veremeyko, A. W. Y. Yung, D. C. Anthony, T. Strelakova, E. D. Ponomarev, Early  
1249 Growth Response Gene-2 Is Essential for M1 and M2 Macrophage Activation and  
1250 Plasticity by Modulation of the Transcription Factor CEBP $\beta$ , *Front Immunol* **9**, 2515  
1251 (2018).
- 1252 34. B. Daniel, Z. Czimmerer, L. Halasz, P. Boto, Z. Kolostyak, S. Poliska, W. K. Berger, P.  
1253 Tzerpos, G. Nagy, A. Horvath, G. Hajas, T. Cseh, A. Nagy, S. Sauer, J. Francois-  
1254 Deleuze, I. Szatmari, A. Bacsi, L. Nagy, The transcription factor EGR2 is the molecular  
1255 linchpin connecting STAT6 activation to the late, stable epigenomic program of  
1256 alternative macrophage polarization, *Genes Dev* **34**, 1474–1492 (2020).
- 1257 35. Hoeksema, M., A., Shen, Z., Holtman, I., R., Zheng, A., Spann, N., Cobo, I., Gymrek, M.,  
1258 Glass, C., K., 2020. Mechanisms underlying divergent responses of genetically distinct  
1259 macrophages to IL-4. *Biorxiv*. <http://doi.org/10.1101/2020.11.02.365742>.



- 1260 36. Buttgereit, I. Lelios, X. Yu, M. Vrohings, N. R. Krakoski, E. L. Gautier, R. Nishinakamura,  
1261 B. Becher, M. Greter, Sall1 is a transcriptional regulator defining microglia identity and  
1262 function, *Nature immunology* **17**, 1397–1406 (2016).
- 1263 37. Butovsky, M. P. Jedrychowski, C. S. Moore, R. Cialic, A. J. Lanser, G. Gabriely, T.  
1264 Koeglspenger, B. Dake, P. M. Wu, C. E. Doykan, Z. Fanek, L. Liu, Z. Chen, J. D.  
1265 Rothstein, R. M. Ransohoff, S. P. Gygi, J. P. Antel, H. L. Weiner, Identification of a  
1266 unique TGF- $\beta$ -dependent molecular and functional signature in microglia, *Nat. Neurosci.*  
1267 **17**, 131–143 (2014).
- 1268 38. H. Lund, M. Pieber, R. Parsa, D. Grommisch, E. Ewing, L. Kular, J. Han, K. Zhu, J.  
1269 Nijssen, E. Hedlund, M. Needhamsen, S. Ruhmann, A. O. Guerreiro-Cacais, R.  
1270 Berglund, M. J. Forteza, D. F. J. Ketelhuth, O. Butovsky, M. Jagodic, X.-M. Zhang, R. A.  
1271 Harris, Fatal demyelinating disease is induced by monocyte-derived macrophages in the  
1272 absence of TGF- $\beta$  signaling, *Nature immunology* **19**, 1–7 (2018).
- 1273 39. M. Williams, F. R. Svedberg, Does tissue imprinting restrict macrophage plasticity?  
1274 *Nature immunology* **496**, 445 (2021).
- 1275 40. R. Peng, S. Sridhar, G. Tyagi, J. E. Phillips, R. Garrido, P. Harris, L. Burns, L. Renteria,  
1276 J. Woods, L. Chen, J. Allard, P. Ravindran, H. Bitter, Z. Liang, C. M. Hogaboam, C.  
1277 Kitson, D. C. Budd, J. S. Fine, C. M. T. Bauer, C. S. Stevenson, Bleomycin induces  
1278 molecular changes directly relevant to idiopathic pulmonary fibrosis: a model for “active”  
1279 disease, *PLoS ONE* **8**, e59348 (2013).
- 1280 41. A. V. Misharin, L. Morales-Nebreda, P. A. Reyfman, C. M. Cuda, J. M. Walter, A. C.  
1281 McQuattie-Pimentel, C.-I. Chen, K. R. Anekalla, N. Joshi, K. J. N. Williams, H. Abdala-  
1282 Valencia, T. J. Yacoub, M. Chi, S. Chiu, F. J. Gonzalez-Gonzalez, K. Gates, A. P. Lam,  
1283 T. T. Nicholson, P. J. Homan, S. Soberanes, S. Dominguez, V. K. Morgan, R. Saber, A.  
1284 Shaffer, M. Hinchcliff, S. A. Marshall, A. Bharat, S. Berdnikovs, S. M. Bhorade, E. T.  
1285 Bartom, R. I. Morimoto, W. E. Balch, J. I. Sznajder, N. S. Chandel, G. M. Mutlu, M. Jain,  
1286 C. J. Gottardi, B. D. Singer, K. M. Ridge, N. Bagheri, A. Shilatifard, G. R. S. Budinger, H.  
1287 Perlman, Monocyte-derived alveolar macrophages drive lung fibrosis and persist in the  
1288 lung over the life span, *The Journal of experimental medicine* **214**, 2387–2404 (2017).
- 1289 42. D. Aran, A. P. Looney, L. Liu, E. Wu, V. Fong, A. Hsu, S. Chak, R. P. Naikawadi, P. J.  
1290 Wolters, A. R. Abate, A. J. Butte, M. Bhattacharya, Reference-based analysis of lung  
1291 single-cell sequencing reveals a transitional profibrotic macrophage, *Nature immunology*  
1292 **20**, 163–172 (2019).
- 1293 43. S. Yona, K.-W. Kim, Y. Wolf, A. Mildner, D. Varol, M. Breker, D. Strauss-Ayali, S. Viukov,  
1294 M. Williams, A. Misharin, D. A. Hume, H. Perlman, B. Malissen, E. Zelzer, S. Jung, Fate  
1295 mapping reveals origins and dynamics of monocytes and tissue macrophages under  
1296 homeostasis, *Immunity* **38**, 79–91 (2013).
- 1297 44. T. Goldmann, P. Wieghofer, P. F. Müller, Y. Wolf, D. Varol, S. Yona, S. M. Brendecke, K.  
1298 Kierdorf, O. Staszewski, M. Datta, T. Luedde, M. Heikenwalder, S. Jung, M. Prinz, A new  
1299 type of microglia gene targeting shows TAK1 to be pivotal in CNS autoimmune  
1300 inflammation, *Nat. Neurosci.* **16**, 1618–1626 (2013).
- 1301 45. S. Chakarov, H. Y. Lim, L. Tan, S. Y. Lim, P. See, J. Lum, X.-M. Zhang, S. Foo, S.  
1302 Nakamizo, K. Duan, W. T. Kong, R. Gentek, A. Balachander, D. Carbajo, C. Blieriot, B.  
1303 Malleret, J. K. C. Tam, S. Baig, M. Shabeer, S.-A. E. S. Toh, A. Schlitzer, A. Larbi, T.  
1304 Marichal, B. Malissen, J. Chen, M. Poidinger, K. Kabashima, M. Bajénoff, L. G. Ng, V.  
1305 Angeli, F. Ginhoux, Two distinct interstitial macrophage populations coexist across  
1306 tissues in specific subtissular niches, *Science (New York, N.Y)* **363**, eaau0964 (2019).
- 1307 46. E. Sajti, V. M. Link, Z. Ouyang, N. J. Spann, E. Westin, C. E. Romanoski, G. J. Fonseca,  
1308 L. S. Prince, C. K. Glass, Transcriptomic and epigenetic mechanisms underlying myeloid  
1309 diversity in the lung, *Nature immunology* **21**, 221–231 (2020).
- 1310 47. S. Hirano, C. D. Anuradha, S. Kanno, Transcription of *krox-20/egr-2* is upregulated after  
1311 exposure to fibrous particles and adhesion in rat alveolar macrophages, *Am. J. Respir.*  
1312 *Cell Mol. Biol.* **23**, 313–319 (2000).

- 1313 48. S. Kharbanda, T. Nakamura, R. Stone, R. Hass, S. Bernstein, R. Datta, V. P. Sukhatme,  
1314 D. Kufe, Expression of the early growth response 1 and 2 zinc finger genes during  
1315 induction of monocytic differentiation, *J. Clin. Invest.* **88**, 571–577 (1991).
- 1316 49. K. J. Gregory, S. M. Morin, S. S. Schneider, Regulation of early growth response 2  
1317 expression by secreted frizzled related protein 1, *BMC Cancer* **17**, 473 (2017).
- 1318 50. F. R. Svedberg, S. L. Brown, M. Z. Krauss, L. Campbell, C. Sharpe, M. Clausen, G. J.  
1319 Howell, H. Clark, J. Madsen, C. M. Evans, T. E. Sutherland, A. C. Ivens, D. J. Thornton,  
1320 R. K. Grencis, T. Hussell, D. M. Cunoosamy, P. C. Cook, A. S. MacDonald, The lung  
1321 environment controls alveolar macrophage metabolism and responsiveness in type 2  
1322 inflammation, *Nature immunology* **20**, 571–580 (2019).
- 1323 51. J. S. Brown, T. Hussell, S. M. Gilliland, D. W. Holden, J. C. Paton, M. R. Ehrenstein, M.  
1324 J. Walport, M. Botto, The classical pathway is the dominant complement pathway  
1325 required for innate immunity to *Streptococcus pneumoniae* infection in mice, *Proc. Natl.*  
1326 *Acad. Sci. U.S.A.* **99**, 16969–16974 (2002).
- 1327 52. M. A. Bewley, R. C. Budd, E. Ryan, J. Cole, P. Collini, J. Marshall, U. Kolsum, G. Beech,  
1328 R. D. Emes, I. Tcherniaeva, G. A. M. Berbers, S. R. Walmsley, G. Donaldson, J. A.  
1329 Wedzicha, I. Kilty, W. Rumsey, Y. Sanchez, C. E. Brightling, L. E. Donnelly, P. J. Barnes,  
1330 D. Singh, M. K. B. Whyte, D. H. Dockrell, COPD MAP, Opsonic Phagocytosis in Chronic  
1331 Obstructive Pulmonary Disease Is Enhanced by Nrf2 Agonists, *Am. J. Respir. Crit. Care*  
1332 *Med.* **198**, 739–750 (2018).
- 1333 53. N. Joshi, S. Watanabe, R. Verma, R. P. Jablonski, C.-I. Chen, P. Cheresch, N. S. Markov,  
1334 P. A. Reyfman, A. C. McQuattie-Pimentel, L. Sichizya, Z. Lu, R. Piseaux-Aillon, D.  
1335 Kirchenbuechler, A. S. Flozak, C. J. Gottardi, C. M. Cuda, H. Perlman, M. Jain, D. W.  
1336 Kamp, G. R. S. Budinger, A. V. Misharin, A spatially restricted fibrotic niche in pulmonary  
1337 fibrosis is sustained by M-CSF/M-CSFR signalling in monocyte-derived alveolar  
1338 macrophages, *Eur. Respir. J.* **55**, 1900646 (2020).
- 1339 54. M. A. Gibbons, A. C. MacKinnon, P. Ramachandran, K. Dhaliwal, R. Duffin, A. T.  
1340 Phythian-Adams, N. van Rooijen, C. Haslett, S. E. Howie, A. J. Simpson, N. Hirani, J.  
1341 Gauldie, J. P. Iredale, T. Sethi, S. J. Forbes, Ly6Chi monocytes direct alternatively  
1342 activated profibrotic macrophage regulation of lung fibrosis, *Am. J. Respir. Crit. Care*  
1343 *Med.* **184**, 569–581 (2011).
- 1344 55. H. Cui, D. Jiang, S. Banerjee, N. Xie, T. Kulkarni, R.-M. Liu, S. R. Duncan, G. Liu,  
1345 Monocyte-derived alveolar macrophage apolipoprotein E participates in pulmonary  
1346 fibrosis resolution, *JCI Insight* **5** (2020), doi:10.1172/jci.insight.134539.
- 1347 56. A. J. Byrne, J. E. Powell, B. J. O'Sullivan, P. P. Ogger, A. Hoffland, J. Cook, K. L.  
1348 Bonner, R. J. Hewitt, S. Wolf, P. Ghai, S. A. Walker, S. W. Lukowski, P. L. Molyneaux, S.  
1349 Saglani, D. C. Chambers, T. M. Maher, C. M. Lloyd, Dynamics of human monocytes and  
1350 airway macrophages during healthy aging and after transplant, *The Journal of*  
1351 *experimental medicine* **217** (2020), doi:10.1084/jem.20191236.
- 1352 57. E. Evren, E. Ringqvist, K. P. Tripathi, N. Sleiers, I. C. Rives, A. Alisjahbana, Y. Gao, D.  
1353 Sarhan, T. Halle, C. Sorini, R. Lepzien, N. Marquardt, J. Michaëlsson, A. Smed-  
1354 Sörensen, J. Botling, M. C. I. Karlsson, E. J. Villablanca, T. Willinger, Distinct  
1355 developmental pathways from blood monocytes generate human lung macrophage  
1356 diversity, *Immunity* **54**, 259–275.e7 (2021).
- 1357 58. Luche, H., Weber, O., Rao, T., N., Blum, C., Fehling, H., J., 2007. Faithful activation of  
1358 an extra-bright red fluorescent protein in “knock-in” Cre-reporter mice ideally suited for  
1359 lineage tracing studies. *37*(1), 43–53. <http://doi.org/10.1002/eji.200636745>
- 1360 59. R. W. Lynch, C. A. Hawley, A. Pellicoro, C. C. Bain, J. P. Iredale, S. J. Jenkins, An  
1361 efficient method to isolate Kupffer cells eliminating endothelial cell contamination and  
1362 selective bias, *Journal of leukocyte biology* (2018), doi:10.1002/JLB.1TA0517-169R.
- 1363 60. C. L. Scott, C. C. Bain, A. M. Mowat, Isolation and Identification of Intestinal Myeloid  
1364 Cells, *Methods Mol. Biol.* **1559**, 223–239 (2017).
- 1365 61. S. Tamoutounour, M. Guilliams, F. Montanana Sanchis, H. Liu, D. Terhorst, C. Malosse,  
1366 E. Pollet, L. Ardouin, H. Luche, C. Sanchez, M. Dalod, B. Malissen, S. Henri, Origins and



- 1367 functional specialization of macrophages and of conventional and monocyte-derived  
1368 dendritic cells in mouse skin, *Immunity* **39**, 925–938 (2013).
- 1369 62. C. C. Bain, S. J. Jenkins, Isolation and Identification of Murine Serous Cavity  
1370 Macrophages, *Methods Mol. Biol.* **1784**, 51–67 (2018).
- 1371 63. K. J. Livak, T. D. Schmittgen, Analysis of relative gene expression data using real-time  
1372 quantitative PCR and the 2(-Delta Delta C(T)) Method, *Methods* **25**, 402–408 (2001).
- 1373 64. Dobie, R., Wilson-Kanamori, J. R., Henderson, B., Smith, J. R., Matchett, K. P., Portman,  
1374 J. R., Wallenborg, K., Picelli, S., Zagorska, A., Pendem, S. V., Hudson, T. E., Wu, M. M.,  
1375 Budas, G. R., Breckenridge, D. G., Harrison, E. M., Mole, D. J., Wigmore, S. J.,  
1376 Ramachandran, P., Ponting, C. P., Teichmann, S. A., ... Henderson, N. C. Single-Cell  
1377 Transcriptomics Uncovers Zonation of Function in the Mesenchyme during Liver  
1378 Fibrosis. *Cell reports*, 29(7), 1832–1847.e8. <https://doi.org/10.1016/j.celrep.2019.10.024>  
1379 (2019).
- 1380 65. R. Satija, J. A. Farrell, D. Gennert, A. F. Schier, A. Regev, Spatial reconstruction of  
1381 single-cell gene expression data, *Nat. Biotechnol.* **33**, 495–502 (2015).
- 1382 66. P. Bankhead, M. B. Loughrey, J. A. Fernández, Y. Dombrowski, D. G. McArt, P. D.  
1383 Dunne, S. McQuaid, R. T. Gray, L. J. Murray, H. G. Coleman, J. A. James, M. Salto-  
1384 Tellez, P. W. Hamilton, QuPath: Open source software for digital pathology image  
1385 analysis, *Sci Rep* **7**, 16878 (2017).

1386

### 1387 **Acknowledgements**

1388 We are grateful to Prof. Ping Wang and Dr. Su-Ling Li, QMUL, London for the kind gift of the  
1389 *Egr2*-floxed strain and to Prof. Rick Maziels, University of Glasgow for the provision of *Irf4ra*-  
1390 deficient mice. Flow cytometry data were generated with support from the QMRI Flow  
1391 Cytometry and Cell Sorting Facility, University of Edinburgh. mRNA sequencing was  
1392 performed by Edinburgh Genomics, The University of Edinburgh. Edinburgh Genomics is  
1393 partly supported through core grants from NERC (R8/H10/56), MRC (MR/K001744/1) and  
1394 BBSRC (BB/J004243/1). Genewiz performed the bulk RNA-seq analysis. We would like to  
1395 thank Beth Henderson for technical expertise in setting up 10X sequencing; Dr. Jordan  
1396 Portman for initial processing of the scRNAseq raw data; the ShIELD (Sheffield, Edinburgh,  
1397 Newcastle and Birmingham) consortium for access to bacterial stocks; Dr. Duncan Humphries  
1398 for training and technical assistance with infection studies and Dr. Brian McHugh for advice  
1399 on bacterial studies. We would also like to thank the Core Services and Advanced  
1400 Technologies at the Cancer Research UK Beatson Institute, with particular thanks to the  
1401 Beatson Advanced Imaging Resource (BAIR). Finally, we would like to thank the Bioresearch  
1402 and Veterinary Services at the University of Edinburgh for husbandry of our mice and other  
1403 technical assistance. Images from Servier Medical Art (CC BY licence 3  
1404 <https://creativecommons.org/licenses/by/3.0/>) were used and adapted for the generation of  
1405 some of the graphics.

1406

1407 This research was funded by a Sir Henry Dale Fellowship jointly funded by the Wellcome Trust  
1408 and the Royal Society [Grant number 206234/Z/17/Z to C.C.B]. CGH is supported by a  
1409 University of Edinburgh Chancellor's Fellowship and CGH and RC are supported by  
1410 Worldwide Cancer Research. The *Lyz2<sup>Cre</sup>.Egr2<sup>fl/fl</sup>* line was originally generated with funding  
1411 from the Medical Research Council UK (MR/L008076/1 to S.J.J). GRJ is funded by a  
1412 Wellcome Trust Clinical Career Development Fellowship (220725/Z/20/Z). SRW is funded by  
1413 a Wellcome Trust Senior Clinical Fellowship (209220). PTKS received funding from the MRC  
1414 (MR/N024524/1). FF and LMC are funded by Cancer Research UK core funding (A23983 &  
1415 A31287), and Breast Cancer Now (2019DecPR1424).

1416 **For the purpose of open access, the author has applied a CC BY public copyright**  
1417 **licence to any Author Accepted Manuscript version arising from this submission.**

1418

1419 **Author Contributions**

1420 J. McC. performed experiments, analysed the data and edited the manuscript. P.M.K.  
1421 Performed scRNA-seq analysis. F.F. Designed and performed immunofluorescence analysis  
1422 of lung tissue. W. T'J. Performed experiments, analysed data and edited the manuscript.  
1423 C.M.M performed experiments and analysed the data. R. C. and C. G. H provided  
1424 bioinformatic analysis of ImmGen data. A.S.M. provided advice on and help with the execution  
1425 of fibrosis experiments. A. H. performed analysis. G.R.J. performed histological analysis of  
1426 lung sections. S.J.J. generated the *Lyz2<sup>Cre</sup>.Egr2<sup>fl/fl</sup>* mice. N. H. provided access to human  
1427 bronchoalveolar samples. S.H. and B.M. generated and provided the *Fcgr1<sup>iCre</sup>* mice. S.R.W.  
1428 advised on the design of fibrosis experiments and provided reagents for infection experiments.  
1429 D.D. advised on the design and execution of infection experiments. P.T.K.S. advised and  
1430 provided infrastructure to perform scRNA-seq analysis. L.M.C. advised and provided  
1431 infrastructure to perform multi-parameter immunofluorescence analysis. C.C.B. conceived  
1432 and performed experiments, analysed and interpreted the data, wrote the manuscript,  
1433 obtained funding and supervised the project.

1434

1435 **Declaration of Interests**

1436 The authors declare no competing interests.
